# Supplementary material
Source: PubMed Central journal article supplement (PMC8898274)
Supplement: NIHMS1777506-supplement-SM.pdf [file NIHMS1777506-supplement-SM.pdf]

## Supporting Information

### Effects of the N-terminal Dynamics on the Conformational States of Human Dopamine Transporter

Liang Xu\* and Liao Y. Chen

Department of Physics and Astronomy, University of Texas at San Antonio, One UTSA Circle, San Antonio, TX, 78249, USA. \*E-mail: [liang.xu@utsa.edu](mailto:liang.xu@utsa.edu); or [liang.xu.cc@gmail.com](mailto:liang.xu.cc@gmail.com).

#### Table of Content

|                                                                                                                   |          |
|-------------------------------------------------------------------------------------------------------------------|----------|
| <b>Fig. S1.</b> Sequence alignment among hDAT, dDAT, LeuT, and hSERT .....                                        | Page S3  |
| <b>Fig. S2.</b> Coordination sites of two Na <sup>+</sup> and one Cl <sup>-</sup> ions in the dDAT and hDAT ..... | Page S4  |
| <b>Fig. S3.</b> RESP partial charges for AMPH molecule .....                                                      | Page S5  |
| <b>Fig. S4.</b> The initial binding sites of AMPH in hDAT and dDAT .....                                          | Page S6  |
| <b>Fig. S5.</b> Results for truncated hDAT(Q, GNM, and residue distances) .....                                   | Page S7  |
| <b>Fig. S6.</b> Reproducible simulation of hDAT (Modell) .....                                                    | Page S8  |
| <b>Fig. S7.</b> Results for p-hDAT (Modell and Model2) .....                                                      | Page S9  |
| <b>Fig. S8.</b> Representative conformations of p-hDAT .....                                                      | Page S10 |
| <b>Fig. S9.</b> Reproducible simulations of p-hDAT (Modell and Model2) .....                                      | Page S11 |
| <b>Fig. S10.</b> Results for truncated hDAT in complex with AMPH .....                                            | Page S13 |
| <b>Fig. S11.</b> Reproducible simulations of AMPH-bound hDAT(59–604) .....                                        | Page S14 |
| <b>Fig. S12.</b> Results for AMPH-bound hDAT .....                                                                | Page S15 |
| <b>Fig. S13.</b> Results for AMPH-bound p-hDAT .....                                                              | Page S16 |
| <b>Fig. S14.</b> Representative conformations of AMPH-bound hDAT and AMPH-bound p-hDAT ..                         | Page S17 |
| <b>Fig. S15.</b> Results for simulations of hDAT with the C-terminal .....                                        | Page S18 |
| <b>Fig. S16.</b> Results for simulations of designed full-length hDAT .....                                       | Page S19 |
| <b>Fig. S17.</b> Distribution of angels of TM1a and TM6a in truncated hDAT .....                                  | Page S21 |
| <b>Fig. S18.</b> Distribution of angels of TM1a and TM6a in hDAT and p-hDAT .....                                 | Page S22 |
| <b>Fig. S19.</b> Distribution of angels of TM1a and TM6a in truncated AMPH-bound hDAT .....                       | Page S23 |
| <b>Fig. S20.</b> Distribution of angels of TM1a and TM6a in AMPH-bound hDAT and p-hDAT .....                      | Page S24 |
| <b>Fig. S21.</b> Contact maps for hDAT(25–604) and AMPH-bound hDAT(25–604) .....                                  | Page S25 |
| <b>Fig. S22.</b> Electrostatic network for hDAT(25–604) and AMPH-bound hDAT(25–604) .....                         | Page S27 |
| <b>Fig. S23.</b> Contact maps for hDAT and p-hDAT .....                                                           | Page S28 |
| <b>Fig. S24.</b> Contact maps for AMPH-bound hDAT and AMPH-bound p-hDAT .....                                     | Page S29 |
| <b>Fig. S25.</b> Electrostatic network for hDAT and p-hDAT .....                                                  | Page S31 |
| <b>Fig. S26.</b> Electrostatic network for AMPH-bound hDAT and AMPH-bound p-hDAT .....                            | Page S32 |
| <b>Fig. S27.</b> Secondary structures calculated for different systems .....                                      | Page S36 |
| <b>Fig. S28.</b> Residues interacting with AMPH for all AMPH-bound systems .....                                  | Page S40 |
| <b>Fig. S29.</b> Molecular docking of ibogaine to hSERT .....                                                     | Page S41 |
| <b>Fig. S30.</b> Representative conformations of hDAT obtained from MD simulations .....                          | Page S42 |
| <b>Fig. S31.</b> Superposition of conformations of hDAT and hSERT .....                                           | Page S43 |
| <b>Table S1.</b> Summary of angels between TM1a and TM6a with respect to z-axis .....                             | Page S20 |
| <b>Table S2.</b> Contact frequency for hDAT(25–604) and AMPH-bound hDAT(25–604) .....                             | Page S26 |
| <b>Table S3.</b> Contact frequency for hDAT, p-hDAT, AMPH-bound hDAT and p-hDAT .....                             | Page S30 |
| <b>Table S4.</b> Contact frequency for AMPH-bound hDAT(25–604) in outward-open state .....                        | Page S33 |
| <b>Table S5.</b> Contact frequency for hDAT in outward-open state .....                                           | Page S34 |

**Table S6.** Contact frequency for AMPH-bound p-hDAT in outward-open state.....Page S35  
**Table S7.** Contact frequency for full-length p-hDAT+AMPH in outward-open state.....Page S37  
**Table S8.** Contact frequency for full-length hDAT in inward-open state.....Page S38  
**Table S9.** Contact frequency for the designed full-length hDAT in outward-open state.....Page S39

```

LeuT ----- 0
hSERT METTPLNSQKQLSACEDGEDCQENGLQKVVPTPGDKVESGQISNGYSAVPSPGAGDDTR 60
dDAT -----MSPTGHISK-- 9
hDAT -----MSKSKCSV-GLMSSVVAPAKEPNAVGPKEVELILVKEQNGVQL-- 42

LeuT -----MEVKREHWATRLGLILAMAGNAVGLGNFLRFPVQAAENGGGAFMIP 46
hSERT HSIPATTTTLVAELHQGERETWKKVDFLLSVIGYAVDLGNVWRFPYICYQNGGGAFLLP 120
dDAT -SKTPTPHNDNNSISDERETWSGKVDLFLSVIGFAVDLANVWRFPYLCYKNGGGAFLLP 68
hDAT -TSSTLTNPRQSPVEAQDRETWKKIDFLLSVIGFAVDLANVWRFPYLCYKNGGGAFLLP 101
      .** * . :.:*:: * **.*. *** . :*****:*

LeuT YIIAFLLVGIPLMWIEWAMGRYGAQGHGTPAIFYLLWRNRF--AKILGVFGLWIPLVV 104
hSERT YTIMAIFFGGIPLFYMELALGQYHRNGCISI-----WRKICPIFKGIGYAICIIAFYI 172
dDAT YGIMLVVGGIPLFYMELALGQHNRKGAITC-----WGRVLPLFKGIGYAVVLI AFYV 120
hDAT YLLFMVIAGMPLFYMELALGQFNREGAAGV-----WK-ICPILKGVGFVILISLYV 152
* : . : *:*:* * *:* . * * : * * : :

LeuT AIYYVYIESWTLGFAIKFLVGLVPEPPN-----ATDP---DSI----- 140
hSERT ASYNTIMAWALYYLISSFTDQLPWTSCKNSWNTGNCTNYFSEDNITW----- 220
dDAT DFYYNVIIAWSLRFFASFTNSLPWTSCNNIWNTPNCRPFESQNASRVPVIGNYSDLYAM 180
hDAT GFFYNVIIAWALHYLFSSFTTELPWIHCNNSWNSPNCSDAHPGSSGD----- 200
      :* * :*:* : : : :* : : :

LeuT -----LRPFKEFLYSYIGVP---KGDEPILKPSLFAY 169
hSERT -----TLHSTSPAEEFYTRHVLQIHRSKGLQDLGGIS-WQL 255
dDAT GNQSLLYNETYMNGSSLDTSAVGHVEGFQSAASEYFNRYILELNRSEGIHDLGAIK-WDM 239
hDAT -----SSGLNDTFG-TTAAEYFERGVHLHQSHGIDDLGPPR-WQL 240
      * : : * . : :

LeuT IVFLITMFINVSILIRGISKGIERFAKIAMP TLFILAVFLVIRVFL-LETPNGTAADGLN 228
hSERT ALC---IMLIFTVIYFSIWKGVKTSKVVVWTATF--PYIILSVLLVRGATLPGAWRGVL 310
dDAT ALC---LLIVYLICYFSLWKGI STSGKVVWFATLF--PYAVLLILLIRGLTLPGSFLGIQ 294
hDAT TAC---LVLVIVLLYFSLWKGVKTSKVVWITATM--PYVVL TALLRGLVTLPGAIDGIR 295
      : : : : **:. .* * : : : : * : * :

LeuT FLWTPDFEKLKDPGVWIAAVGQIFFTSLGFGAIIITYASYVRKDQDIVLSGLTAATLNEK 288
hSERT FYLKPWQKLLGTGVWIDAAAQIFFSLGPGFGVLLAFASYNKFNNNCYQDALVTSVNCM 370
dDAT YYLTPNFSAIYKAEVWVDAATQVFFSLGPGFGVLLAYASYNKYHNNVYKDALLTSFINS 354
hDAT AYLSVDFRYLCEASVWIDAATQVCFSLGVGFGVLI AFSSYNKFTNNCYRDAIVTTSINSL 355
      . : : : ** : * * : * : * : * : * : * : : : : *

LeuT AEVILGGSISIPAAVAFFGV--ANAVAIKAGAFNLGFITLPAIFSQTAGGTFGLGFLWF 345
hSERT TSFVSGFVI--FTVLGYMAEMRNEDVSEVAKDAGPSLLFITYAEAIANMPASTFFAIIF 428
dDAT TSFIAGFVI--FSVLGYMAHTLGVRIEDVAT-EGPGLVFVVYPAAIATMPASTFWALIFF 411
hDAT TSFSSGFVV--FSFLGYMAQKHSVPIGDVAK-DGPGLIFIIYPEAIATLPLSSAWAVVFF 412
      : . * : : : : : : * : . * * : : : : : : *

LeuT FLLFFAGLTSIAIMQPIAFLEDELKLSR-KHAVLWTAIVFF--SAHLMVFLNK---S 399
hSERT LMLITLGLDSTFAGLEGVITAVLDFPHVWAKRRERFVLAVVITCFFGSLVTLTFGGAYV 488
dDAT MMLLTLGLDSSFGGSEAITALSDFPKIK-RNRELFVAGLSLYFVVGASCTQGGFYF 470
hDAT IMLLTLGLD SAMGME SVITGLIDEFQLLH-RHRELFTLFIVLATFLLSLFCVTNGGIYV 471
      : : * : * : : : * : : * : : . : . : *

LeuT LDEMDFWAGTIGVVFGLTELIIFWFIFGADKAWEEINRGGI IKVPRIYYYVMRYITPAF 459
hSERT VKLLEEYATGPAVLTVALIEAVAVSWFYGITQFCRDVKEMLGFSPGWFRICWVAISPLF 548
dDAT FHLLDRYAA GYSILVAVFFEAIAVSWIYGTRNFSEDIRDMIGFPPGRYWQVCWRVVAPIF 530
hDAT FTLLDHFAAGT SILFGLVIEAIGVAWFYGVGFSDDIQQMTGQRPSLYWRLCWKLVSPCF 531
      . : : * . : : : * : . * : * : : : . : : : * *

LeuT LAVLLVWAREYIPKIMEETHWTVWITR-----FYIIGLFLFLTFLVFLAE----- 505
hSERT LLFIICSFMLSPQLRFLQYNYPYWSIILGYCIGTSSFICPTYIAYRLIITPGTFKERI 608
dDAT LLFITVYGLIGYEPLTYADYVYPSWANALGWCIA GSSVVMIPAVAIKLLSTPGSLRQRF 590
hDAT LLFVVVSVIVTFRPPHYGAYIFPDWANALGWWIATSSMAMVPIYAA YKFCSLPGSFREKL 591
* : : : : * : : : :

LeuT -----RRRNHESAG-TLVPR----- 519
hSERT IKSITPETPTEIPCGDIRLNA----- 629
dDAT TILTPWRDQQSMAMVLNGVTTEVTVVRLTDTETAKEPVDV 631
hDAT AYAIAPKEDRELVD---RGEVRQFTLRHWLKV----- 620

```

**Fig. S1.** Sequence alignment among human dopamine transporter (hDAT), *Drosophila melanogaster* dopamine transporter (dDAT), bacterial homolog leucine transporter (LeuT), and human serotonin transporter (hSERT). F76, S422, and S429 from hDAT and their equivalent residues in dDAT, LeuT, and hSERT are highlighted in box.

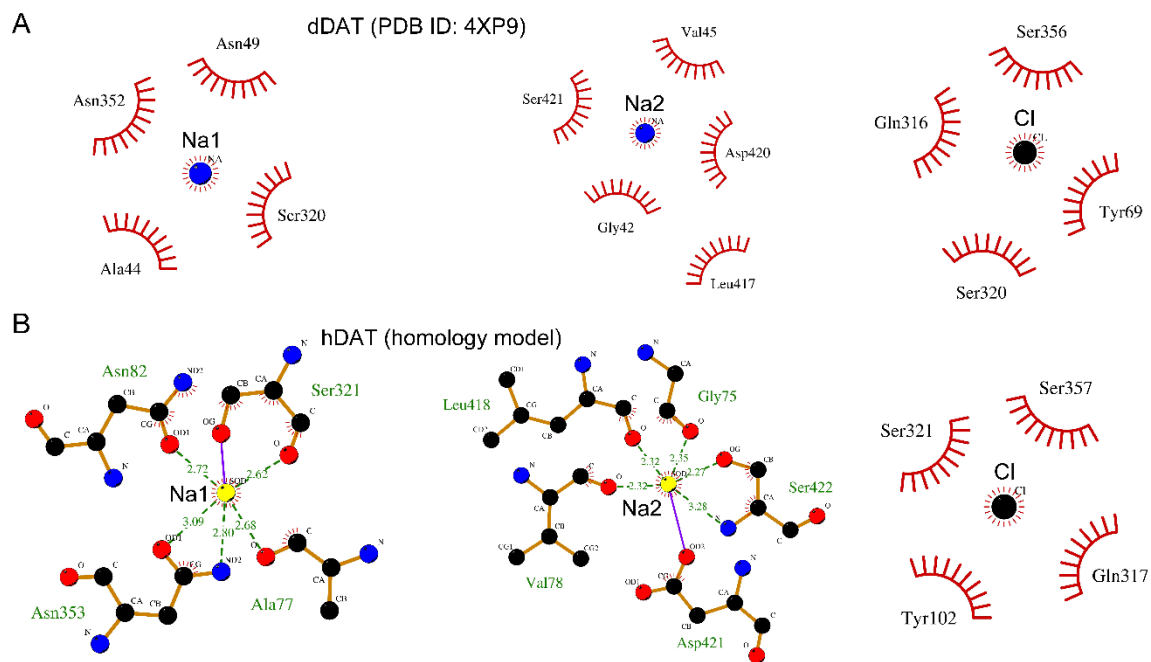

**Fig. S2.** Coordination sites of two  $\text{Na}^+$  and one  $\text{Cl}^-$  ions in the dDAT (A) and hDAT (B). The equivalent sequence between dDAT and hDAT can be seen from Fig. S1. The coordinate sites of  $\text{Na}^+$  and  $\text{Cl}^-$  was detected using LigPlot<sup>+</sup>.<sup>1</sup>

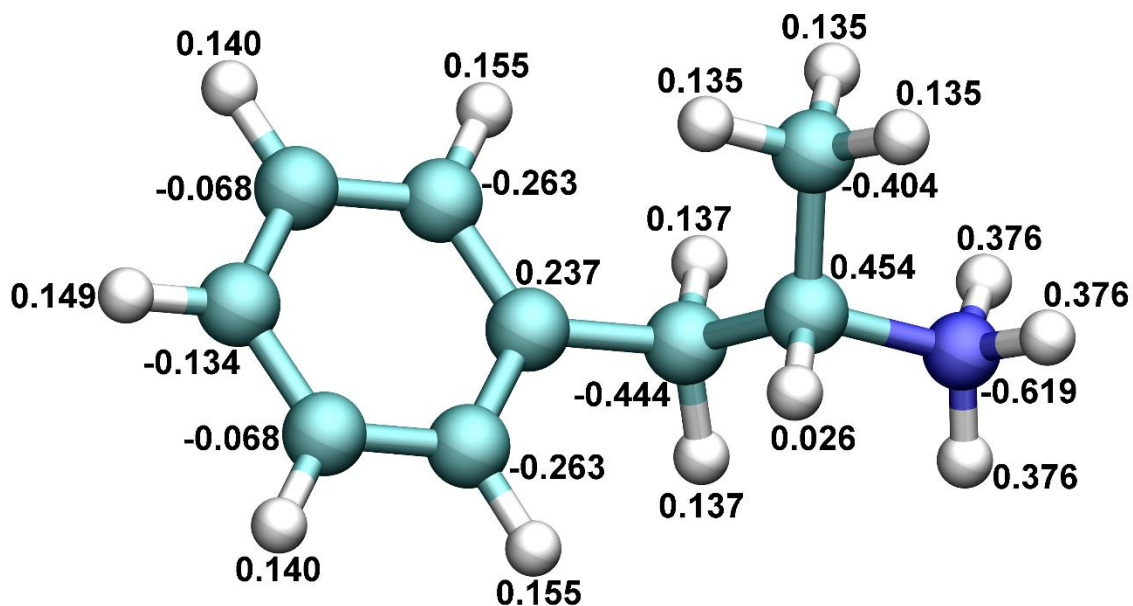

**Fig. S3.** RESP partial charges for AMPH molecule bearing +1e net charge. The molecular geometry of the AMPH structure was optimized at the B3LYP/6-31G\* level. The electrostatic potential was calculated at the same level using the Merz-Kollma (MK) scheme. The restrained electrostatic potential (RESP) method<sup>2</sup> was used to fit the electrostatic potential to obtain atomic partial charges. All quantum chemical calculations were carried out using the Gaussian 03 software.<sup>3</sup>

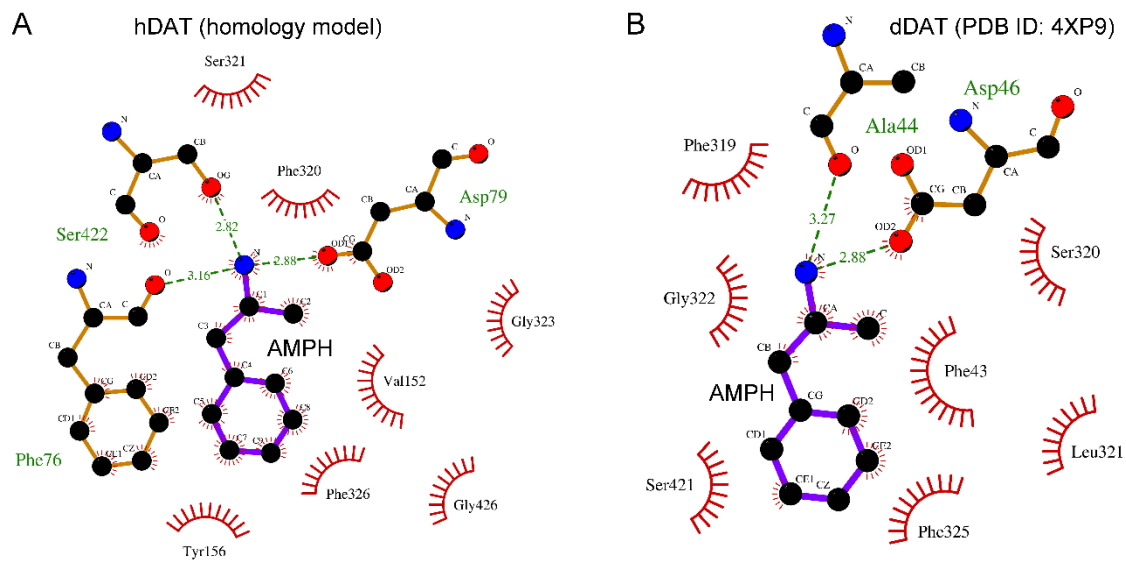

**Fig. S4.** The initial binding sites of AMPH in hDAT (A) and dDAT (B). The equivalent sequence between dDAT and hDAT can be seen from Fig. S1. The binding site of AMPH in dDAT were taken from the crystal structure of dDAT (PDB ID: 4XP9). The binding sites of AMPH were detected using LigPlot<sup>+</sup>.<sup>1</sup>

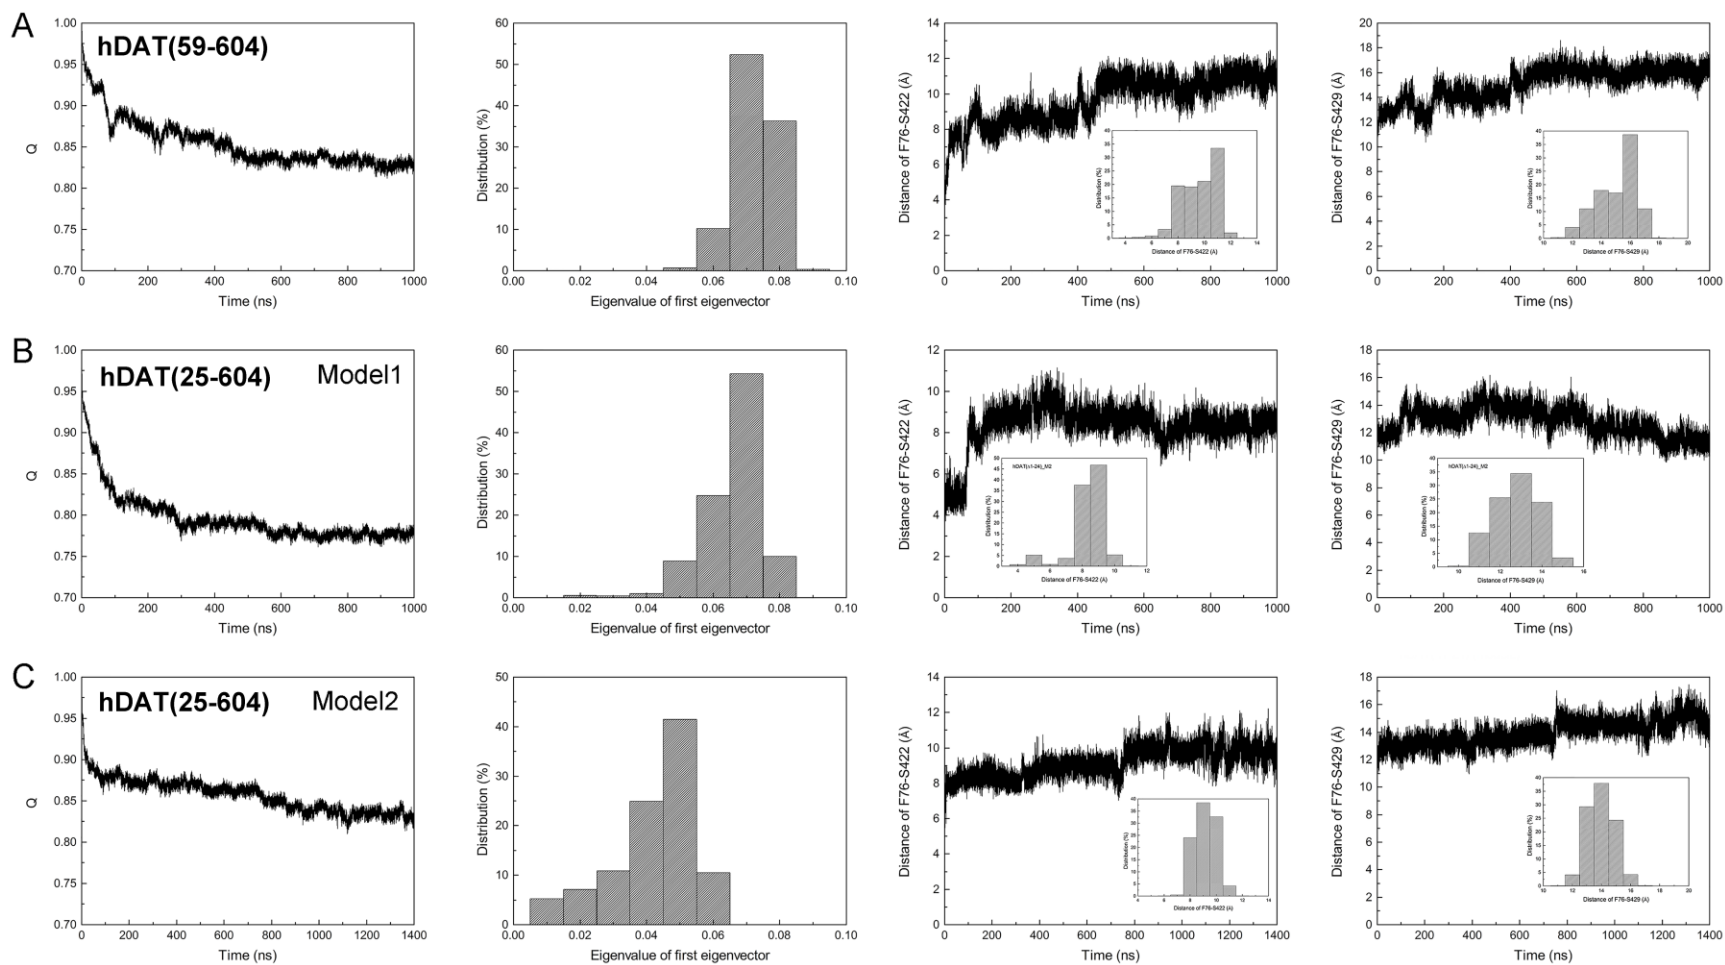

**Fig. S5.** Results (the fraction of native contacts, the GNM model, the distance between Phe76 and Ser422, and the distance between Phe76 and Ser429) of truncated hDAT. (A) Results of hDAT(59–604); (B) Results of the Model 1 of hDAT(25–604); and (C) Results of the Model 2 of hDAT(25–604). The distribution of the distance is shown in the inset of each figure. Model1 and Model2 correspond to the structural models shown in Figure 1 of the main text.

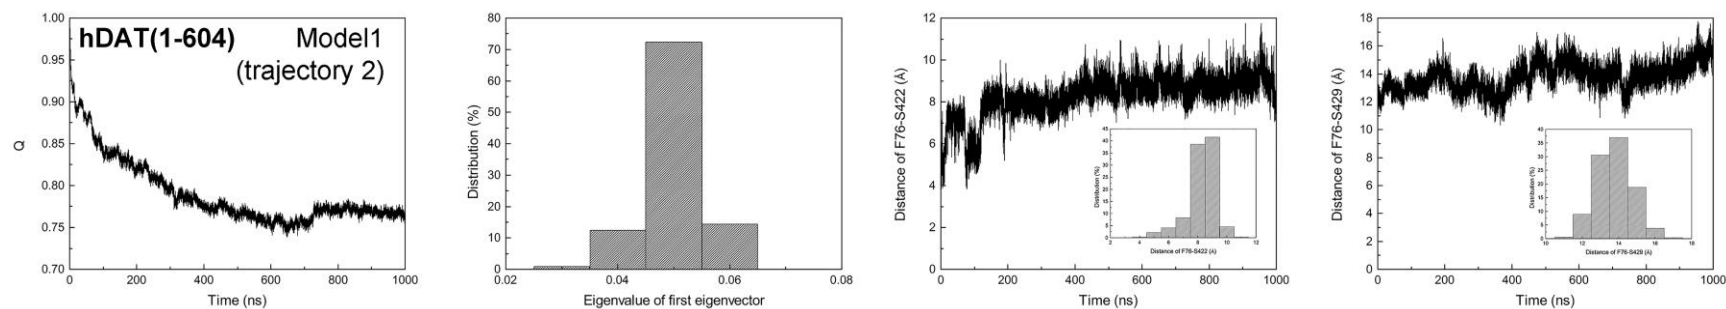

**Fig. S6.** Results (the fraction of native contacts, the GNM model, the distance between Phe76 and Ser422, and the distance between Phe76 and Ser429) of the Model 1 of hDAT(1–604). This is a repeated simulation of the Model1 of hDAT(1–604) using a different random number for the initial velocity distribution. Reproducible results were obtained: single state and inward-open state.



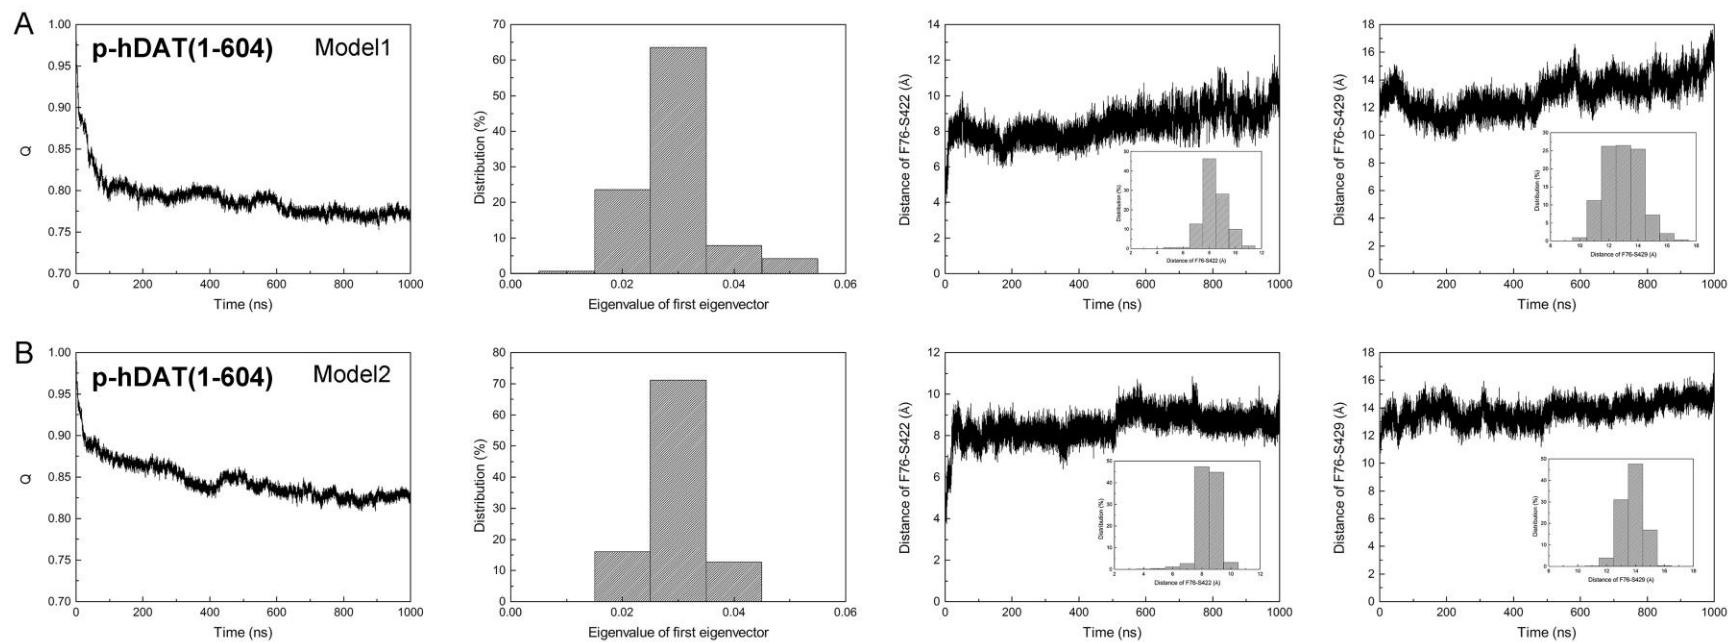

**Fig. S7.** Results (the fraction of native contacts, the GNM model, the distance between Phe76 and Ser422, and the distance between Phe76 and Ser429) of p-hDAT(1–604).

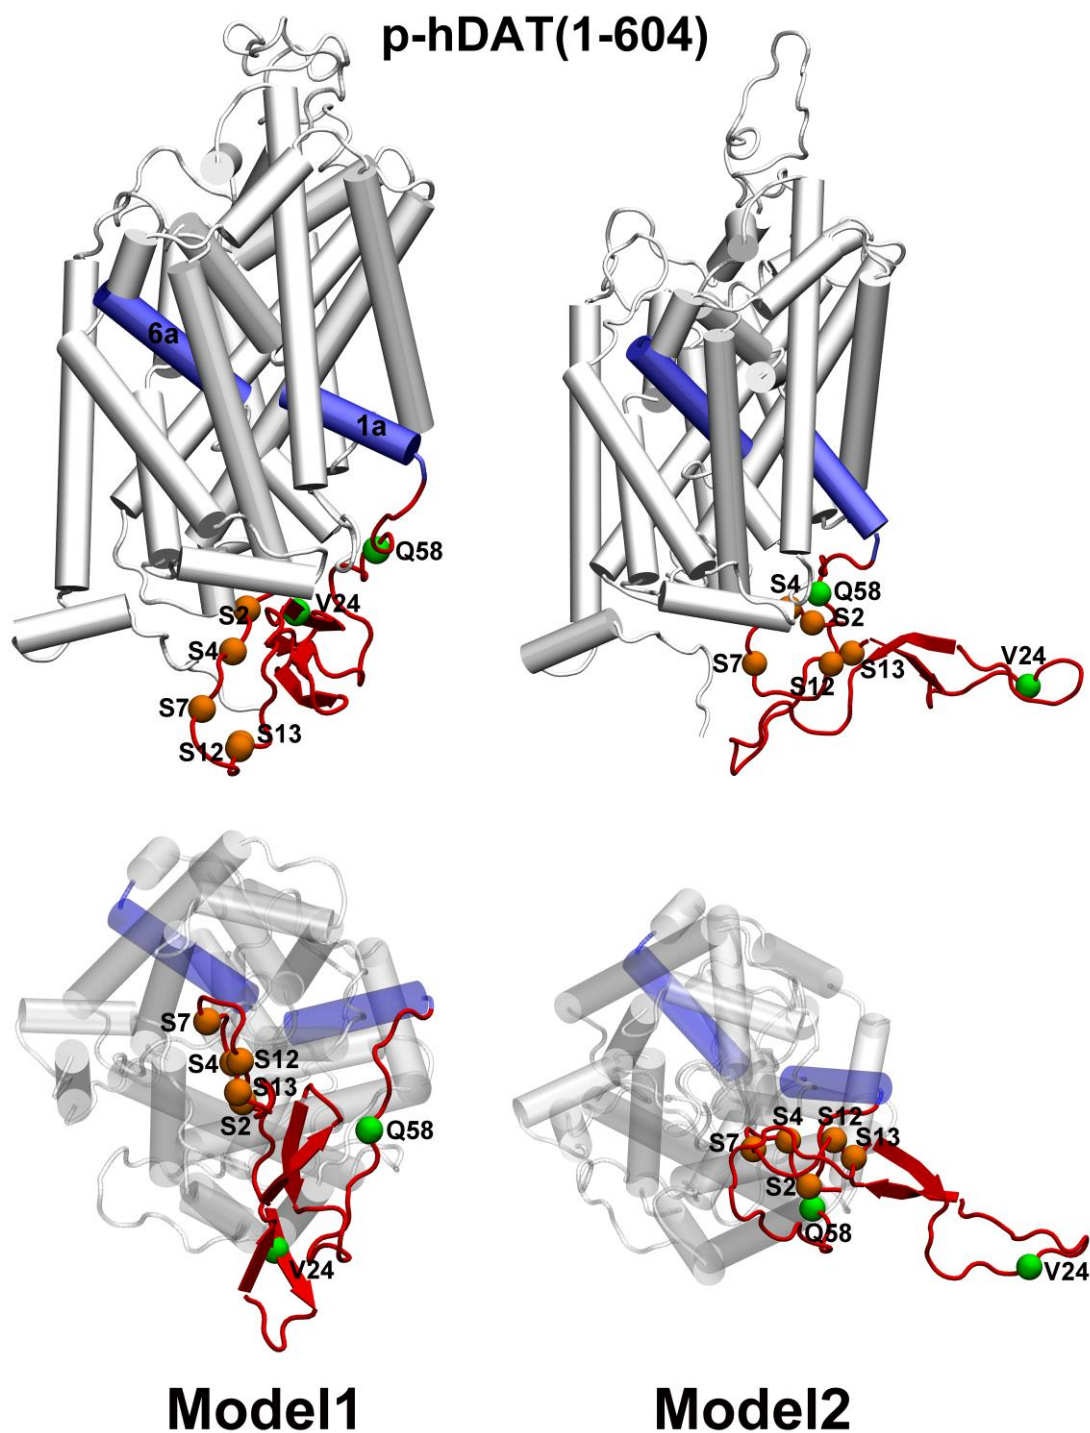

**Fig. S8.** Representative conformations of p-hDAT(1–604) over 1- $\mu$ s MD simulations from side and intracellular views for Model1 and Model 2. The five serine residues and two truncation points (V24 and Q58) are labeled. The N-terminal region is colored in red and the TM1a and TM6a are colored in blue. Model1 and Model2 correspond to the structural models shown in Figure 1 of the main text.

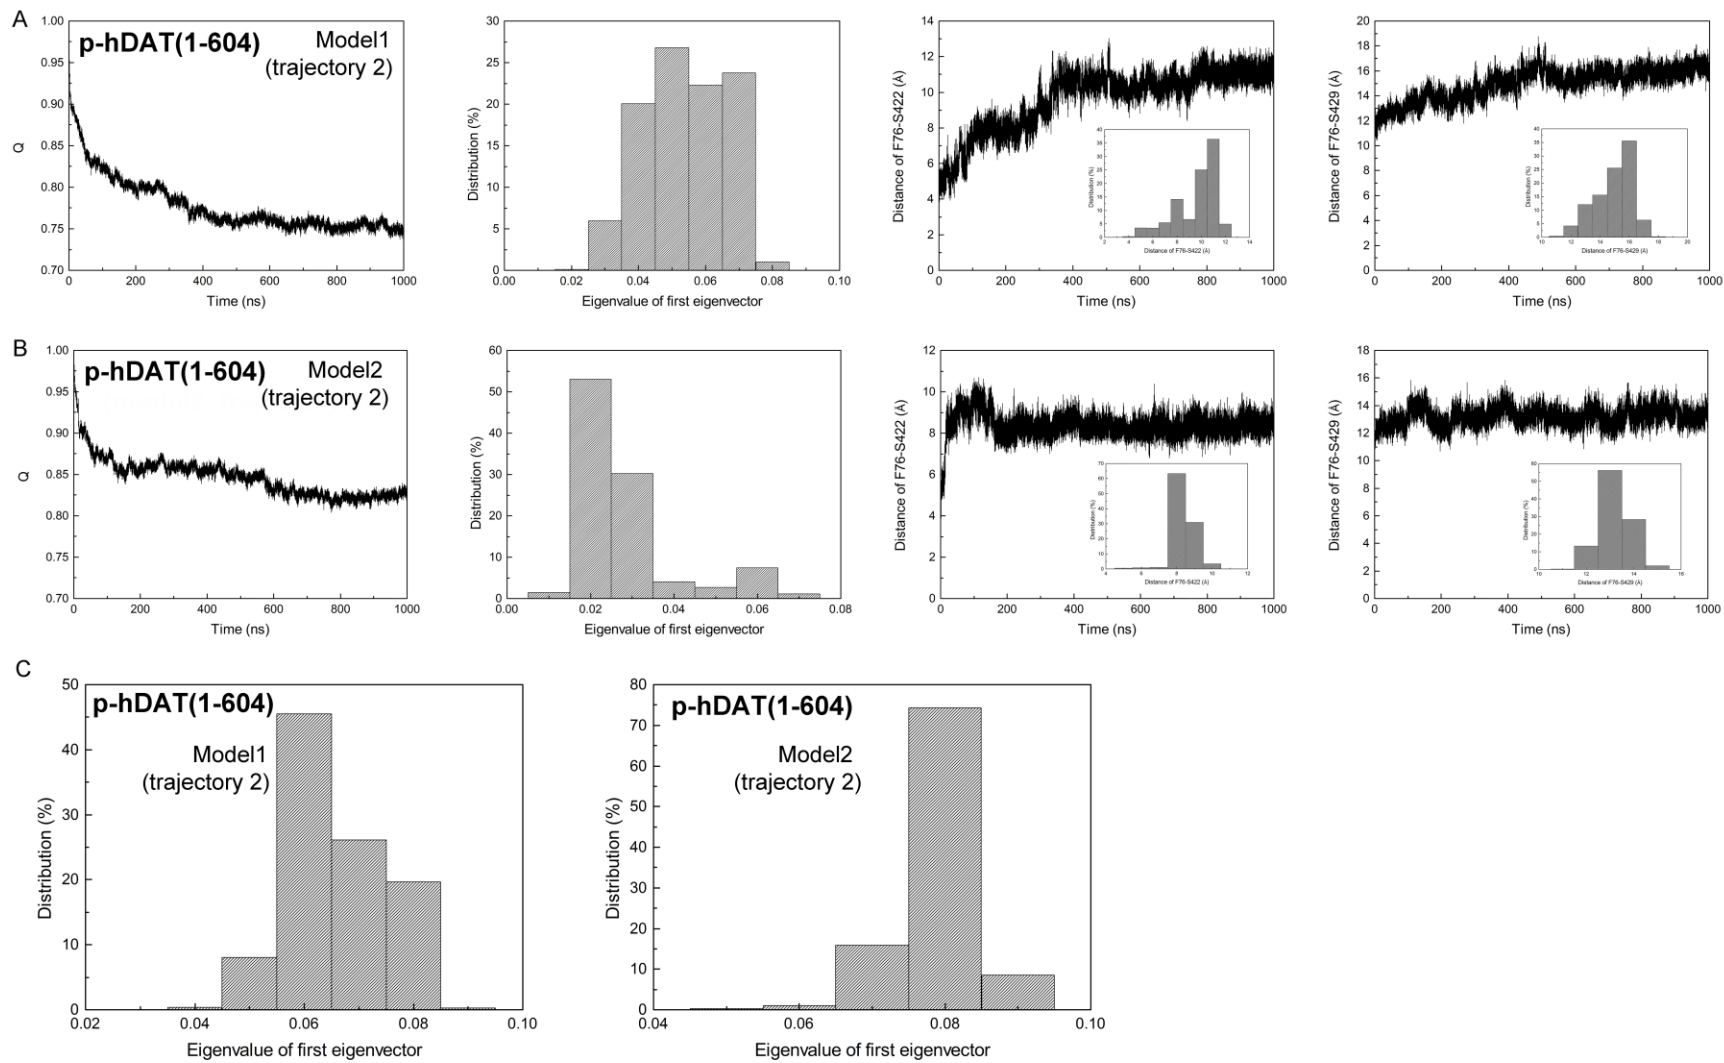

**Fig. S9.** Results (the fraction of native contacts, the GNM model, the distance between Phe76 and Ser422, and the distance between Phe76 and Ser429) of the Model 1 of p-hDAT(1–604) (A) and Model2 of p-hDAT(1–604) (B). These are repeated simulations of the two models of p-hDAT(1–604) using a different random number for the initial velocity distribution. Note that the conformational states (either outward-facing or inward-facing) are defined by the transmembrane domains, however, the presence of N-terminal tail, especially the phosphorylated N-terminal, may introduce noise for the calculation of the relative distribution of conformational states. To test this, we calculated the state distribution involving TM domains (residues 60–604) only, and showed results in (C). A dominant single state was found for both models of p-hDAT(1–604). For AMPH-bound hDAT(25–604) (**Fig. S10D**), and AMP-bound p-hDAT(1–604), we also observed the same effect of N-terminal on the state distribution (**Fig. S13**). Of interest, the N-terminal regions in these systems display various types of  $\beta$ -strands (**Fig. S22** and **Fig. S27**)

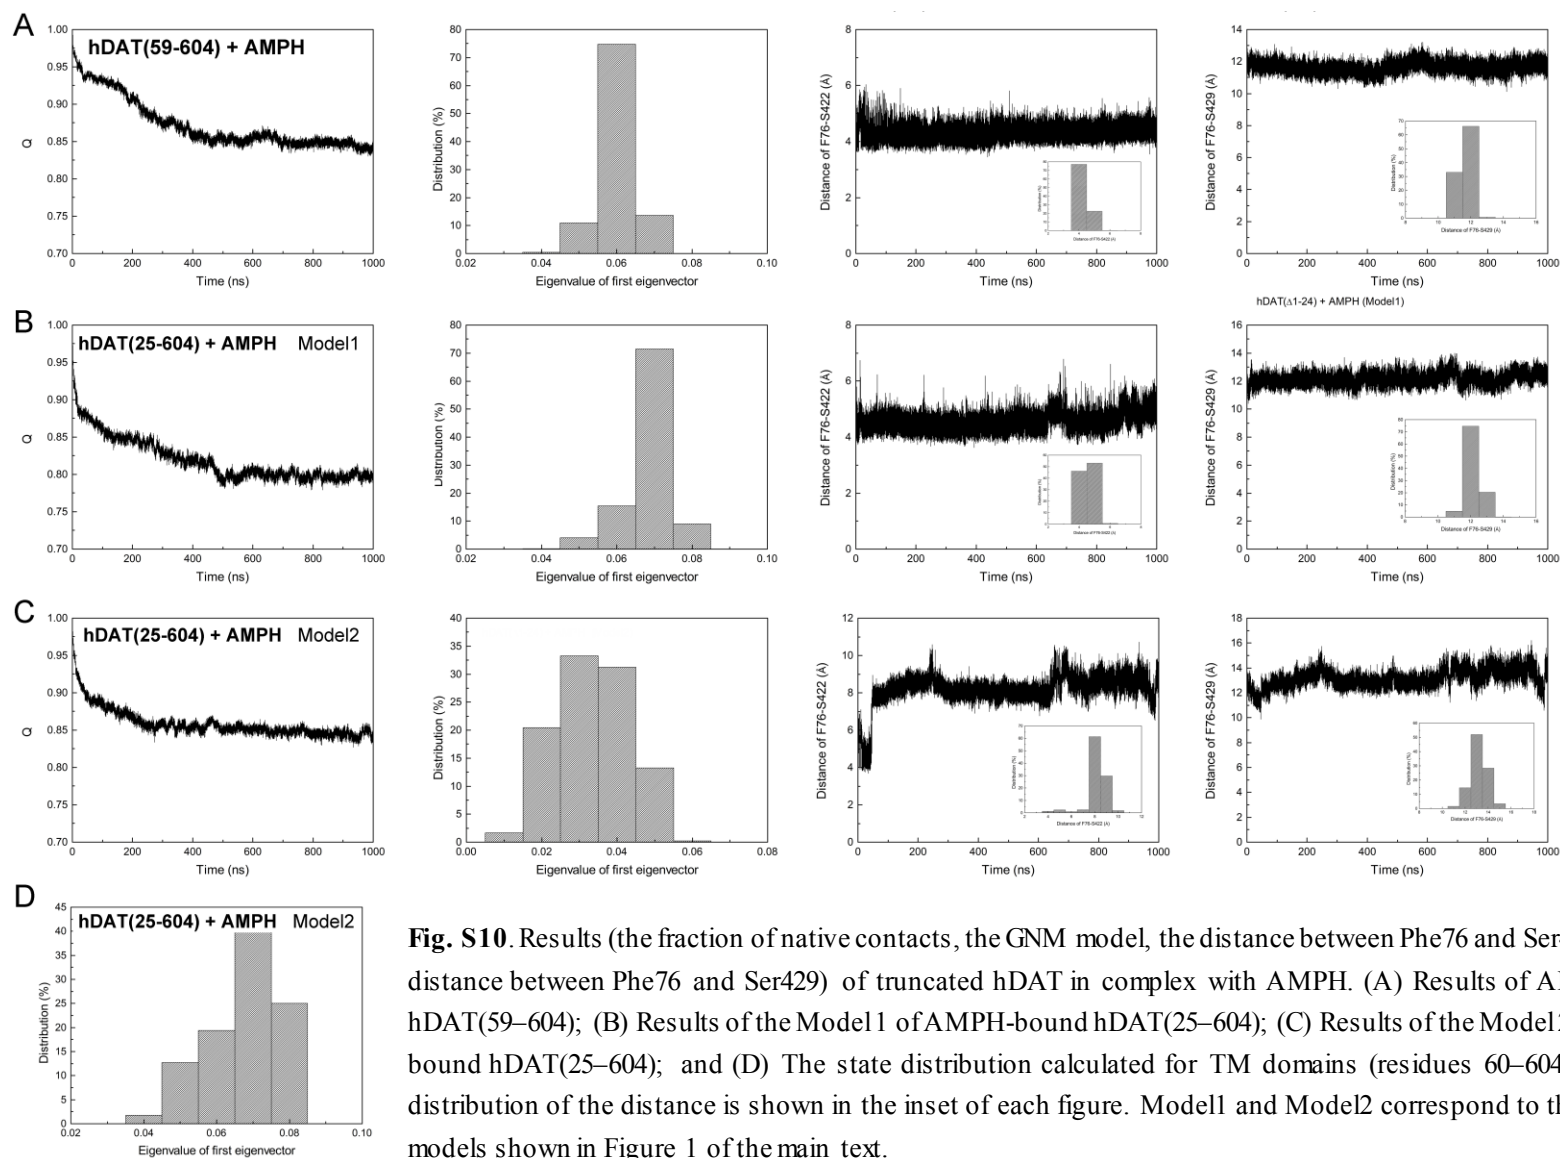

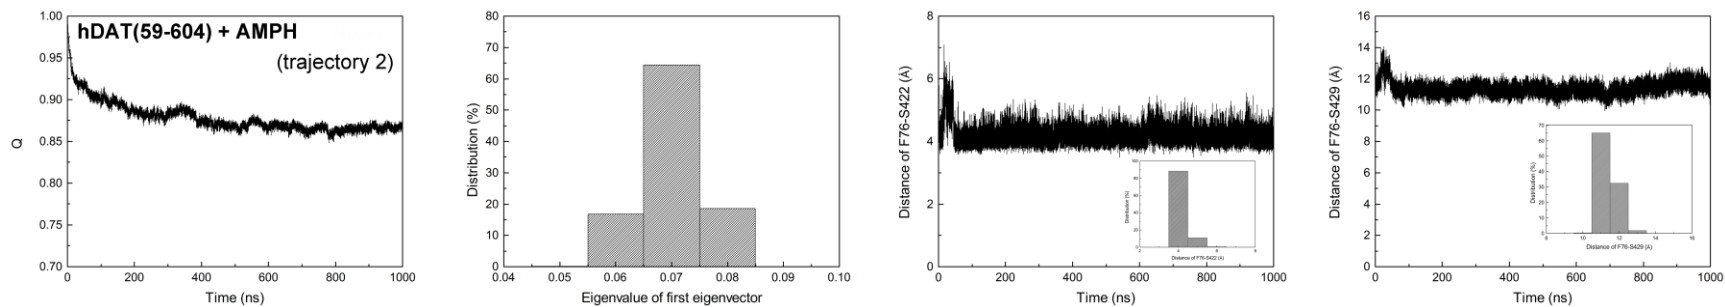

**Fig. S11.** Results (the fraction of native contacts, the GNM model, the distance between Phe76 and Ser422, and the distance between Phe76 and Ser429) of AMPH-bound hDAT(59–604). This is a repeated simulation of hDAT(59–604) in complex with AMPH using a different random number for the initial velocity distribution. Reproducible results were obtained: single state and outward-open state.

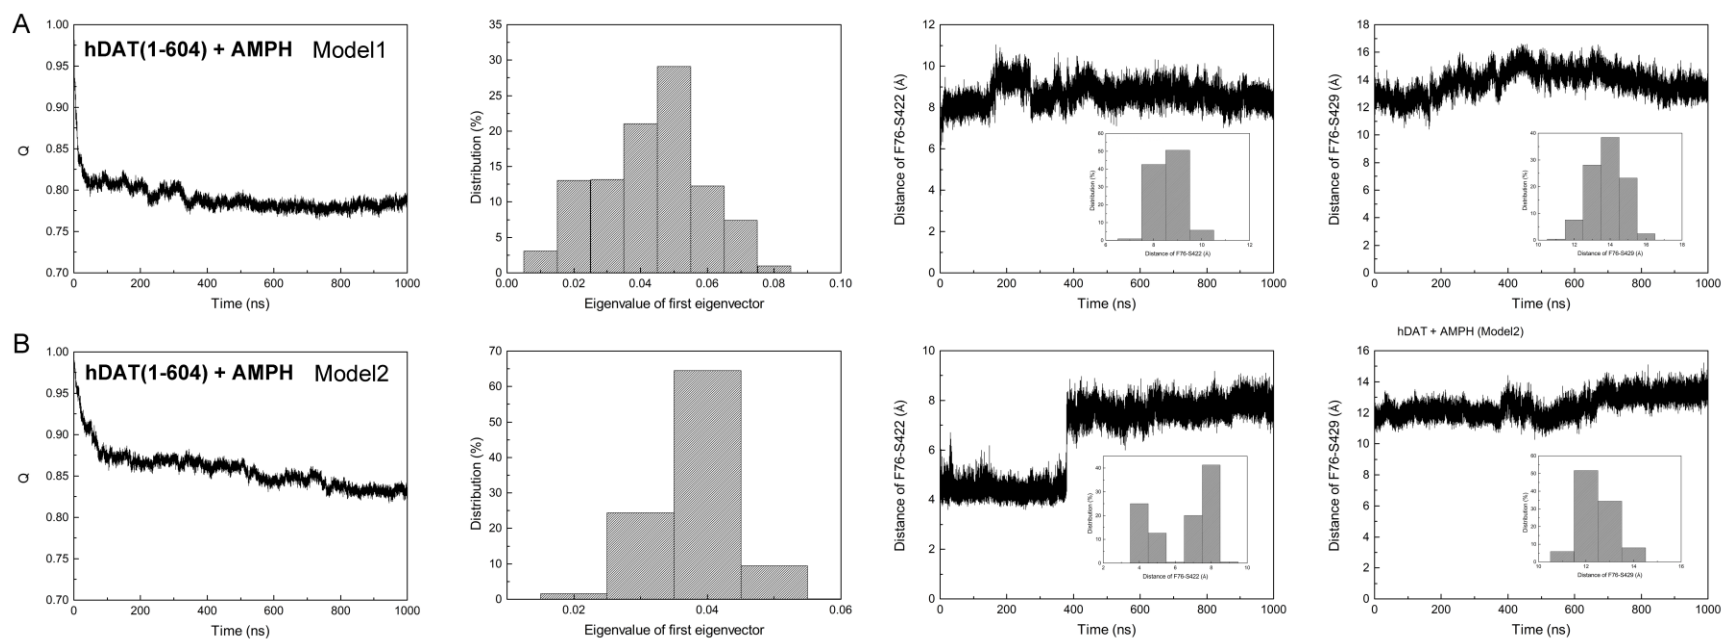

**Fig. S12.** Results (the fraction of native contacts, the GNM model, the distance between Phe76 and Ser422, and the distance between Phe76 and Ser429) of AMPH-bound hDAT(1–604). (A) Results of the Model1 of AMPH-bound hDAT(1–604); and (B) Results of the Model2 of AMPH-bound hDAT(1–604). The distribution of the distance is shown in the inset of each figure. Model1 and Model2 correspond to the structural models shown in Figure 1 of the main text.

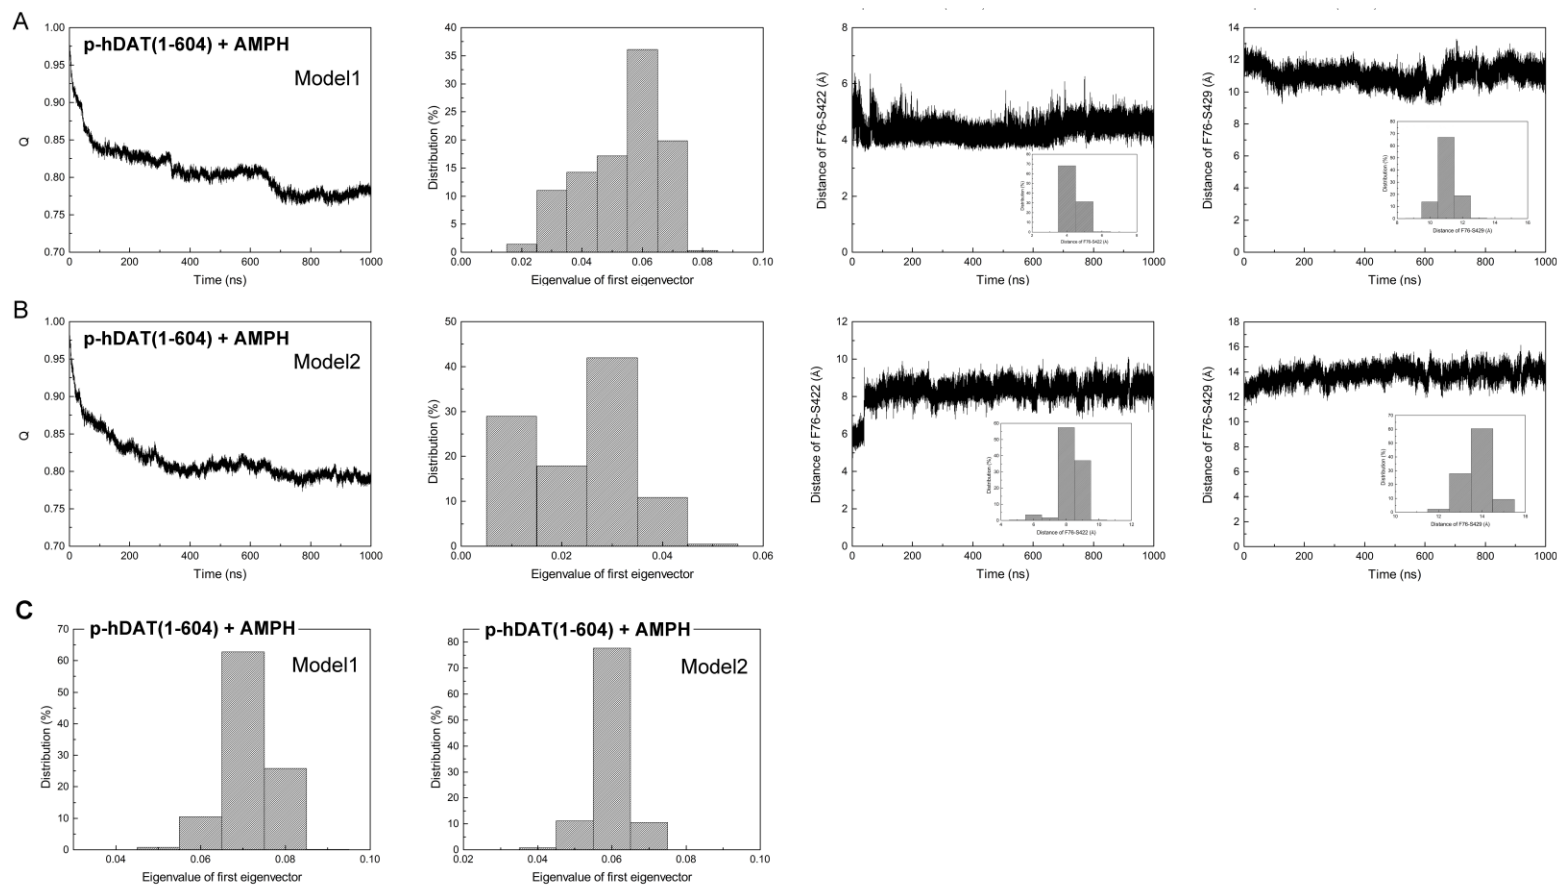

**Fig. S13.** Results (the fraction of native contacts, the GNM model, the distance between Phe76 and Ser422, and the distance between Phe76 and Ser429) of AMPH-bound p-hDAT(1-604). (A) Results of the Model1 of AMPH-bound p-hDAT(1-604); (B) Results of the Model 2 of AMPH-bound p-hDAT(1-604); and (C) The state distribution calculated for TM domains (residues 60-604) only. For details, see **Fig. S9**. The distribution of the distance is shown in the inset of each figure. Model1 and Model2 correspond to the structural models shown in Figure 1 of the main text.



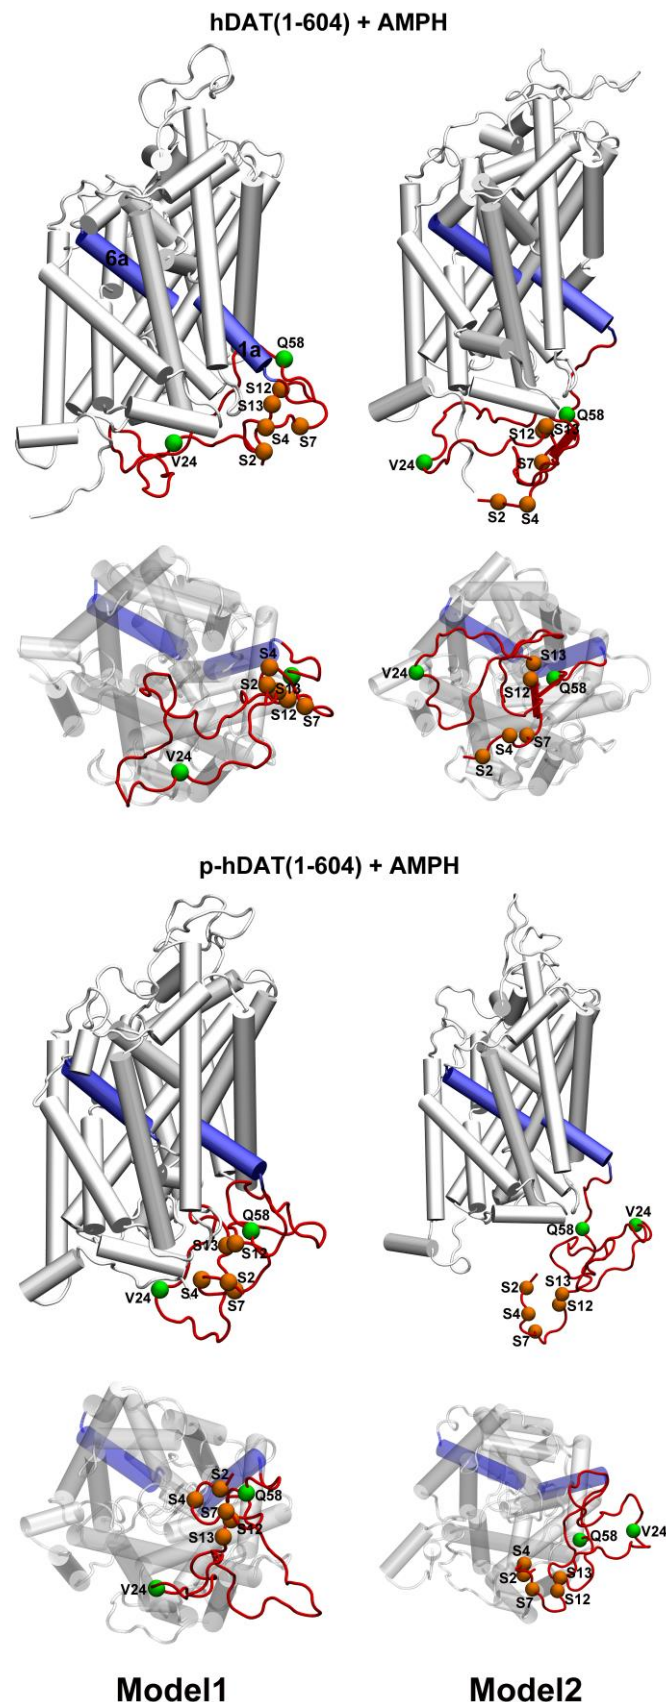

**Fig. S14.** Representative conformations of hDAT(1-604) in complex with AMPH and p-hDAT(1-604) in complex with AMPH over 1- $\mu$ s MD simulations from side and intracellular views for Model1 and Model 2. The five serine residues and two truncation points (V24 and Q58) are labeled. The N-terminal region is colored in red and the TM1a and TM6a are colored in blue. Model1 and Model2 correspond to the structural models shown in Figure 1 of main text.

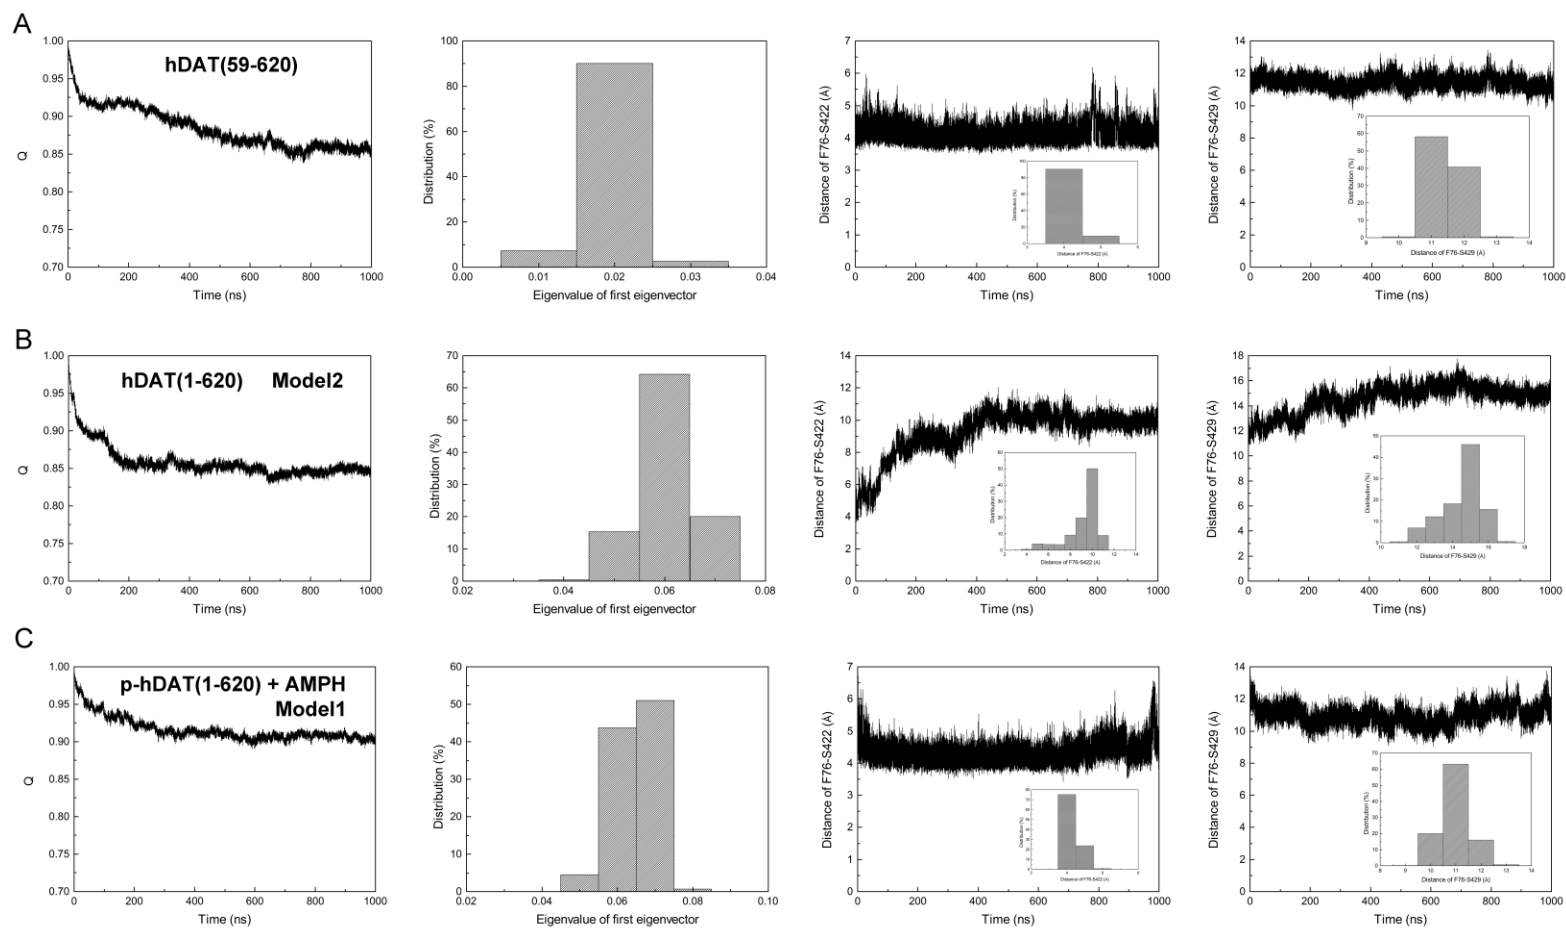

**Fig. S15.** Results (the fraction of native contacts, the GNM model, the distance between Phe76 and Ser422, and the distance between Phe76 and Ser429). (A) Results of hDAT(59–620); (B) Results of the Model2 of hDAT(1–620); and (C) Results of the Model1 of p-hDAT(1–620) in complex with AMPH. The distribution of the distance is shown in the inset of each figure. Model1 and Model2 correspond to the structural models shown in Figure 1 of the main text.

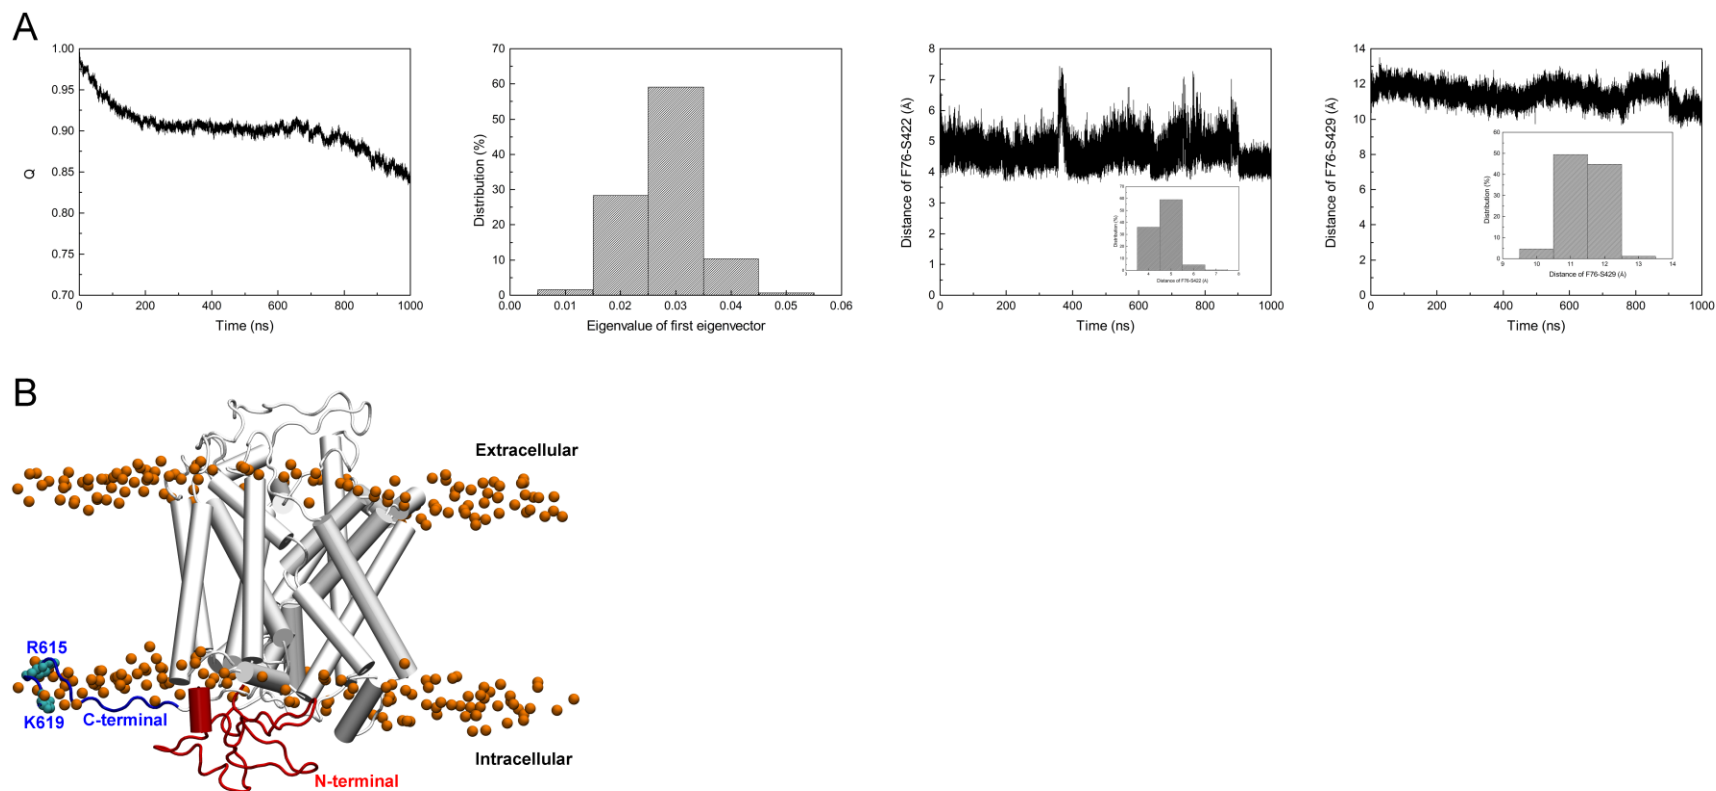

**Fig. S16.** (A) Results (the fraction of native contacts, the GNM model, the distance between Phe76 and Ser422, and the distance between Phe76 and Ser429) of the designed full-length hDAT; (B) Representative conformation of this full-length hDAT in membrane. Note that the C-terminal tail was restrained by electrostatic interactions (Arg615 and Lys619) with lipid head groups, and thus preventing the interactions between the N-terminal and C-terminal regions. As a result, the designed hDAT remained in the outward-open state.

**Table S1.** Summary of angles (in degree, peak values) between TM1a and TM6a with respect to z-axis. The angles correspond to the outward-facing (OF) states are highlighted in yellow. For details, see Figs. S17–S20.

| System                        | hDAT |      | hDAT + AMPH |      |
|-------------------------------|------|------|-------------|------|
|                               | TM1a | TM6a | TM1a        | TM6a |
| <b>hDAT(59–604)</b>           | 28   | 142  | 18          | 145  |
| <b>hDAT(25–604) (Model1)</b>  | 39   | 153  | 28          | 146  |
| <b>hDAT(25–604) (Model2)</b>  | 26   | 146  | 22          | 142  |
| <b>hDAT(1–604) (Model1)</b>   | 10   | 146  | 13          | 143  |
| <b>hDAT(1–604) (Model2)</b>   | 19   | 138  | 23          | 147  |
| <b>p-hDAT(1–604) (Model1)</b> | 32   | 146  | 29          | 142  |
| <b>p-hDAT(1–604) (Model2)</b> | 13   | 146  | 21          | 146  |

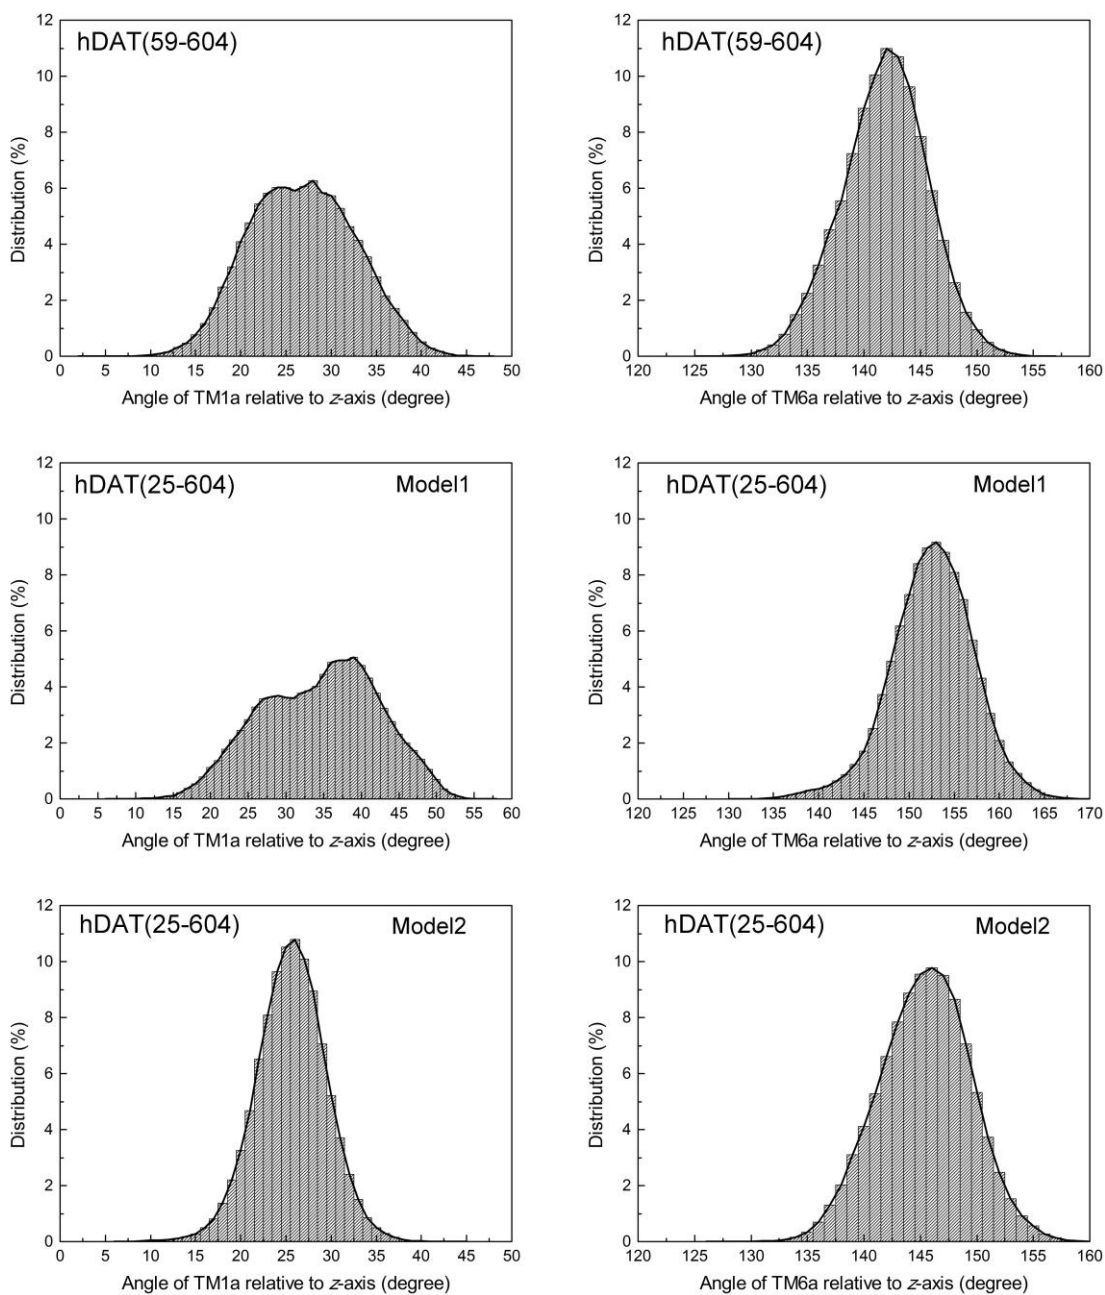

**Fig. S17.** Distribution of angles of TM1a and TM6a with respect to z-axis in truncated hDAT. Model1 and Model2 correspond to the initial models of hDAT show Figure 1 of main text.

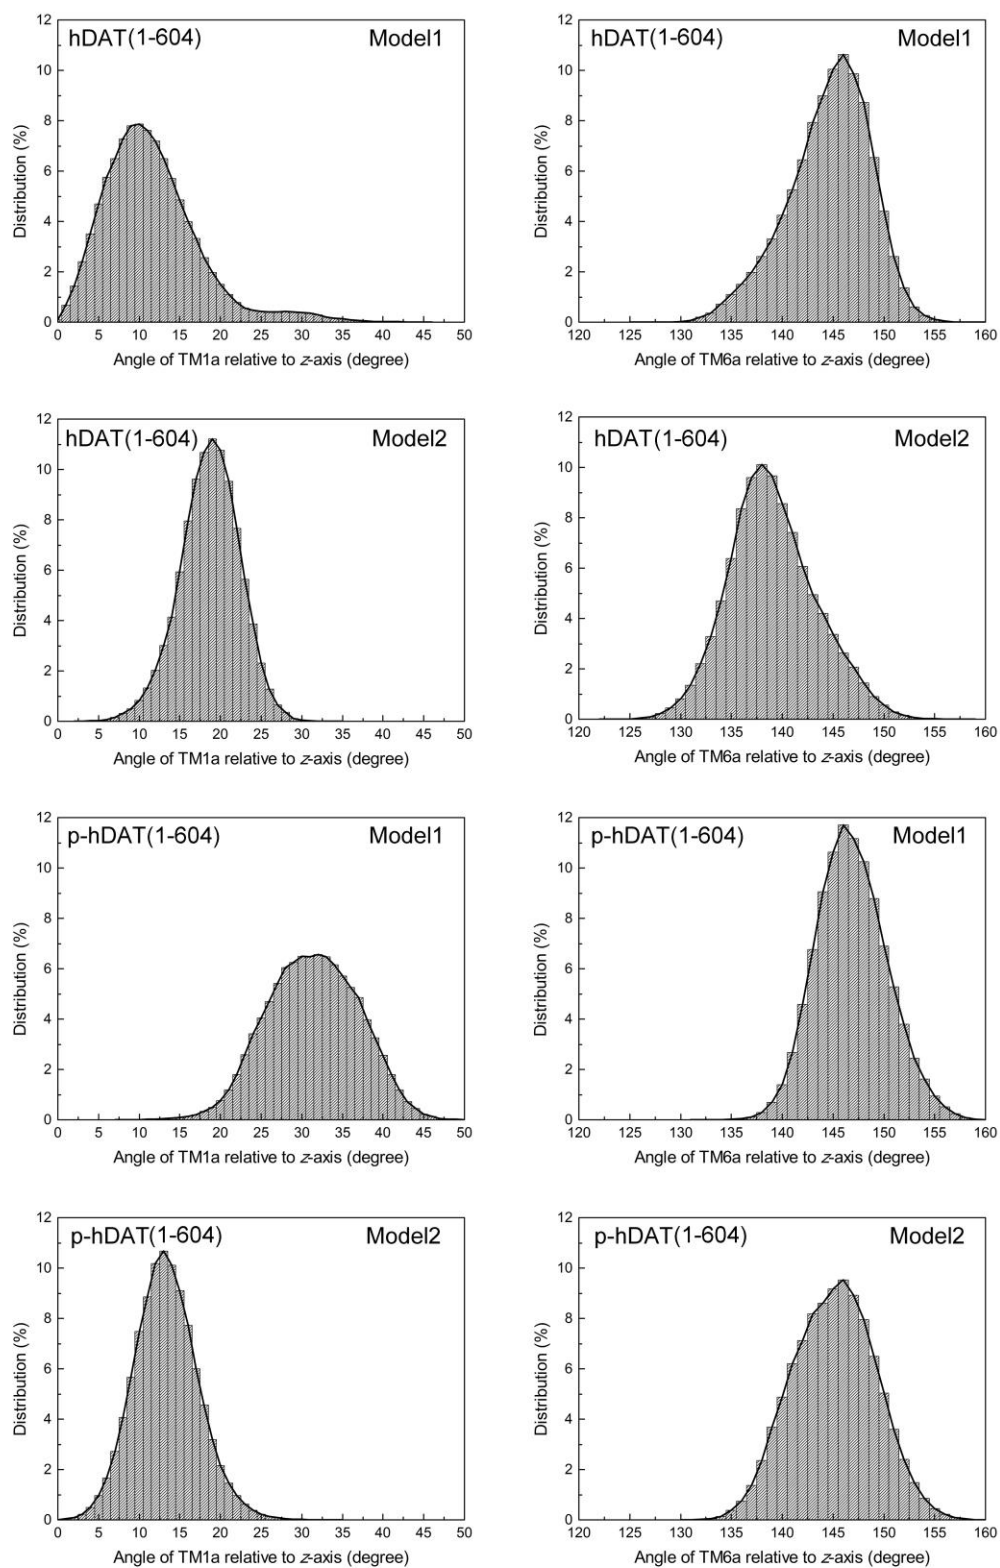

**Fig. S18.** Distribution of angles of TM1a and TM6a with respect to z-axis in hDAT and p-hDAT.

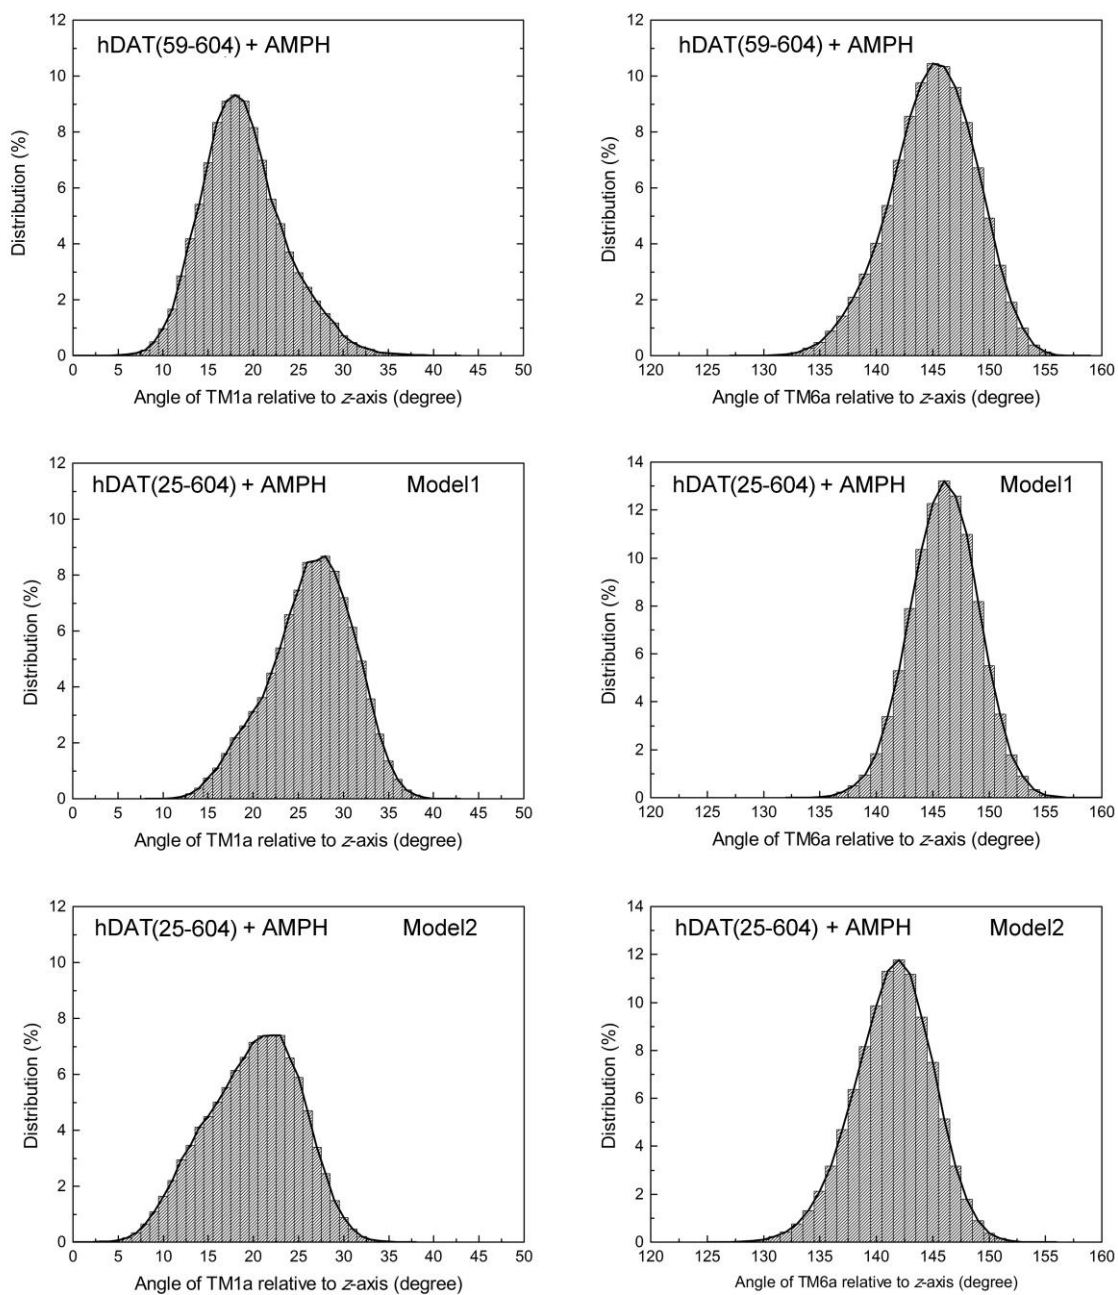

**Fig. S19.** Distribution of angels of TM1a and TM6a with respect to z-axis in truncated hDAT in complex with AMPH.



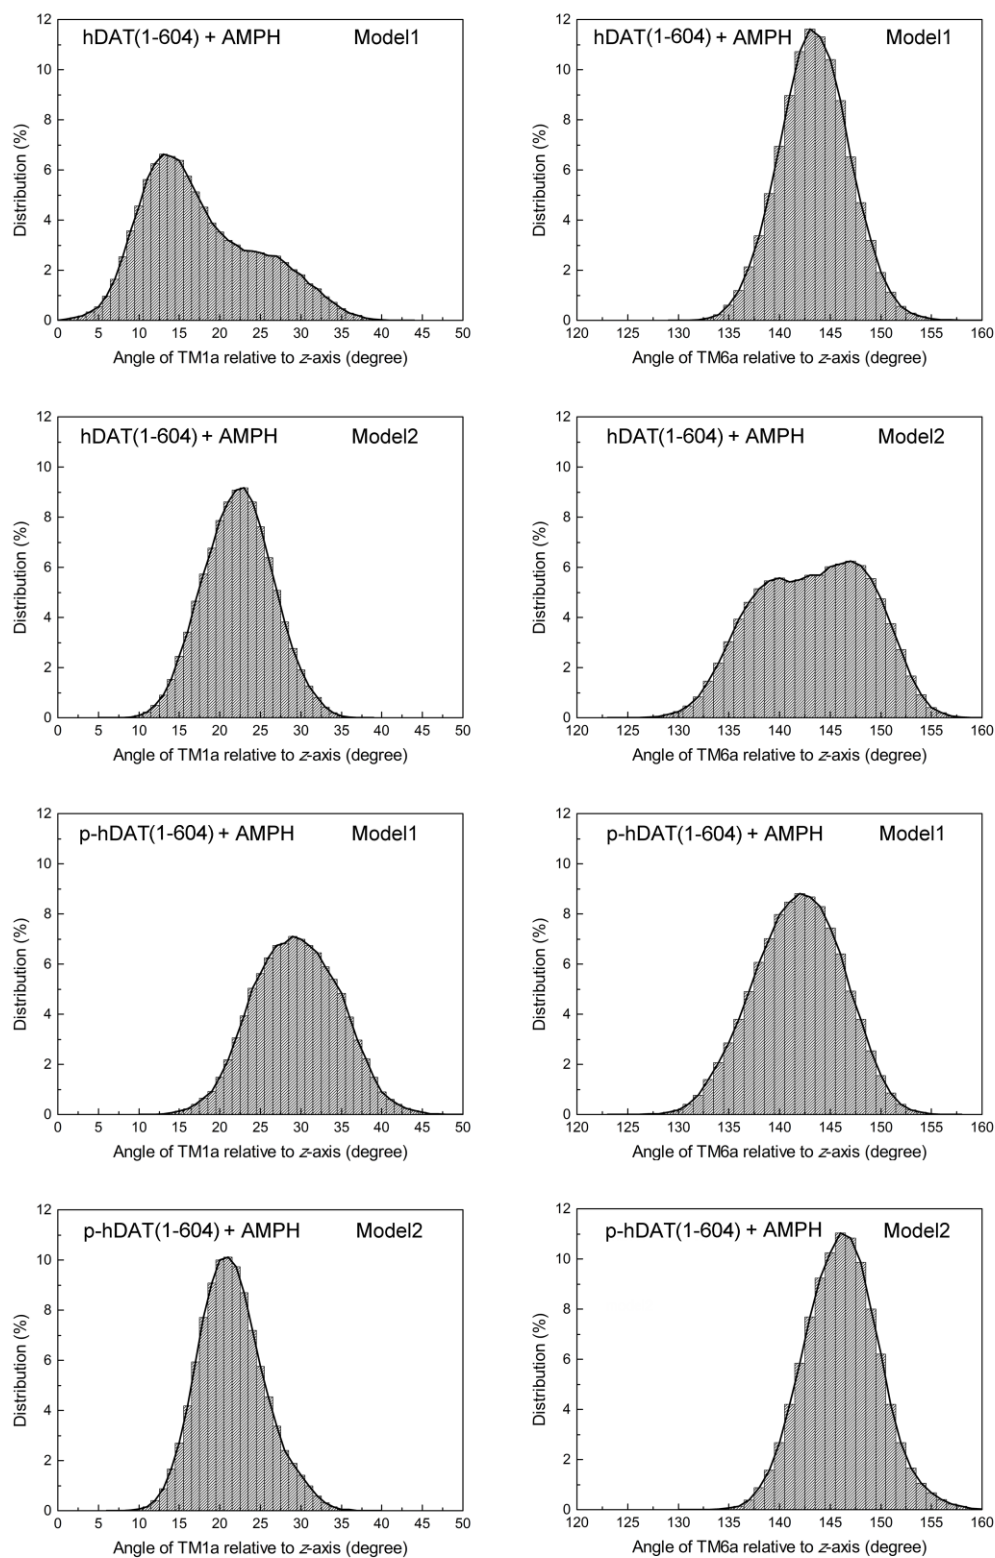

**Fig. S20.** Distribution of angles of TM1a and TM6a with respect to z-axis in AMPH-bound hDAT and p-hDAT.



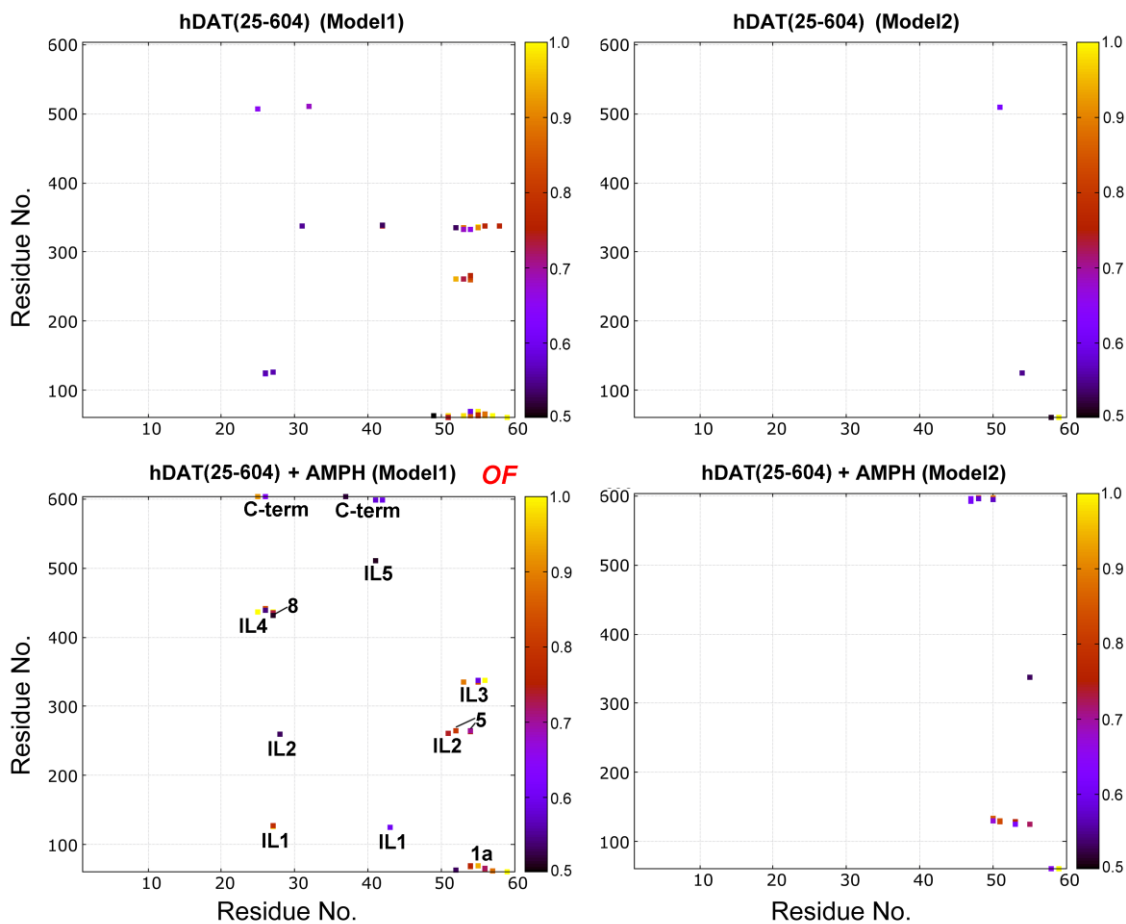

**Fig. S21.** Computed contact maps between residues in the N-terminal and intracellular region of hDAT(25–604) and AMPH-bound hDAT(25–604) models. A contact occurs if any atom in the N-terminal region is within 3 Å of any atom in the TM domains, and only a contact frequency >0.5 (50%) is shown. For electrostatic interactions, see Table S2. Contact frequency was calculated using the last 500-ns trajectory of each system. **OF** denotes the outward-facing open state.

**Table S2.** Contact frequency calculated for short-range electrostatic interactions between residues in the N-terminal and in the intracellular region. IF and OF indicate inward-facing and outward-facing state, respectively. For details, see Fig. S21.

| <b>hDAT(25–604) (Model1, IF)</b>        |                |                   | <b>hDAT (25–604)(Model2, IF)</b>        |                |                   |
|-----------------------------------------|----------------|-------------------|-----------------------------------------|----------------|-------------------|
| Residue in NT                           | Residue in TMs | Contact Frequency | Residue in NT                           | Residue in TMs | Contact Frequency |
| Arg51                                   | Asp59          | 0.88              | No contact frequency > 0.5 was found    |                |                   |
| Glu56                                   | Lys65          | 0.88              |                                         |                |                   |
| Arg51                                   | Arg60          | 0.79              |                                         |                |                   |
| Glu56                                   | Lys337         | 0.76              |                                         |                |                   |
| Arg51                                   | Glu61          | 0.74              |                                         |                |                   |
| Lys27                                   | Glu126         | 0.56              |                                         |                |                   |
| <b>hDAT(25–604) + AMPH (Model1, OF)</b> |                |                   | <b>hDAT(25–604) + AMPH (Model2, IF)</b> |                |                   |
| Residue in NT                           | Residue in TMs | Contact Frequency | Residue in NT                           | Residue in TMs | Contact Frequency |
| Lys27                                   | Asp436         | 1.00              | No contact frequency > 0.5 was found    |                |                   |
| Glu56                                   | Lys337         | 1.00              |                                         |                |                   |
| Lys27                                   | Glu126         | 0.96              |                                         |                |                   |
| Glu56                                   | Lys65          | 0.77              |                                         |                |                   |
| Glu56                                   | Lys66          | 0.72              |                                         |                |                   |
| Glu28                                   | Lys260         | 0.53              |                                         |                |                   |

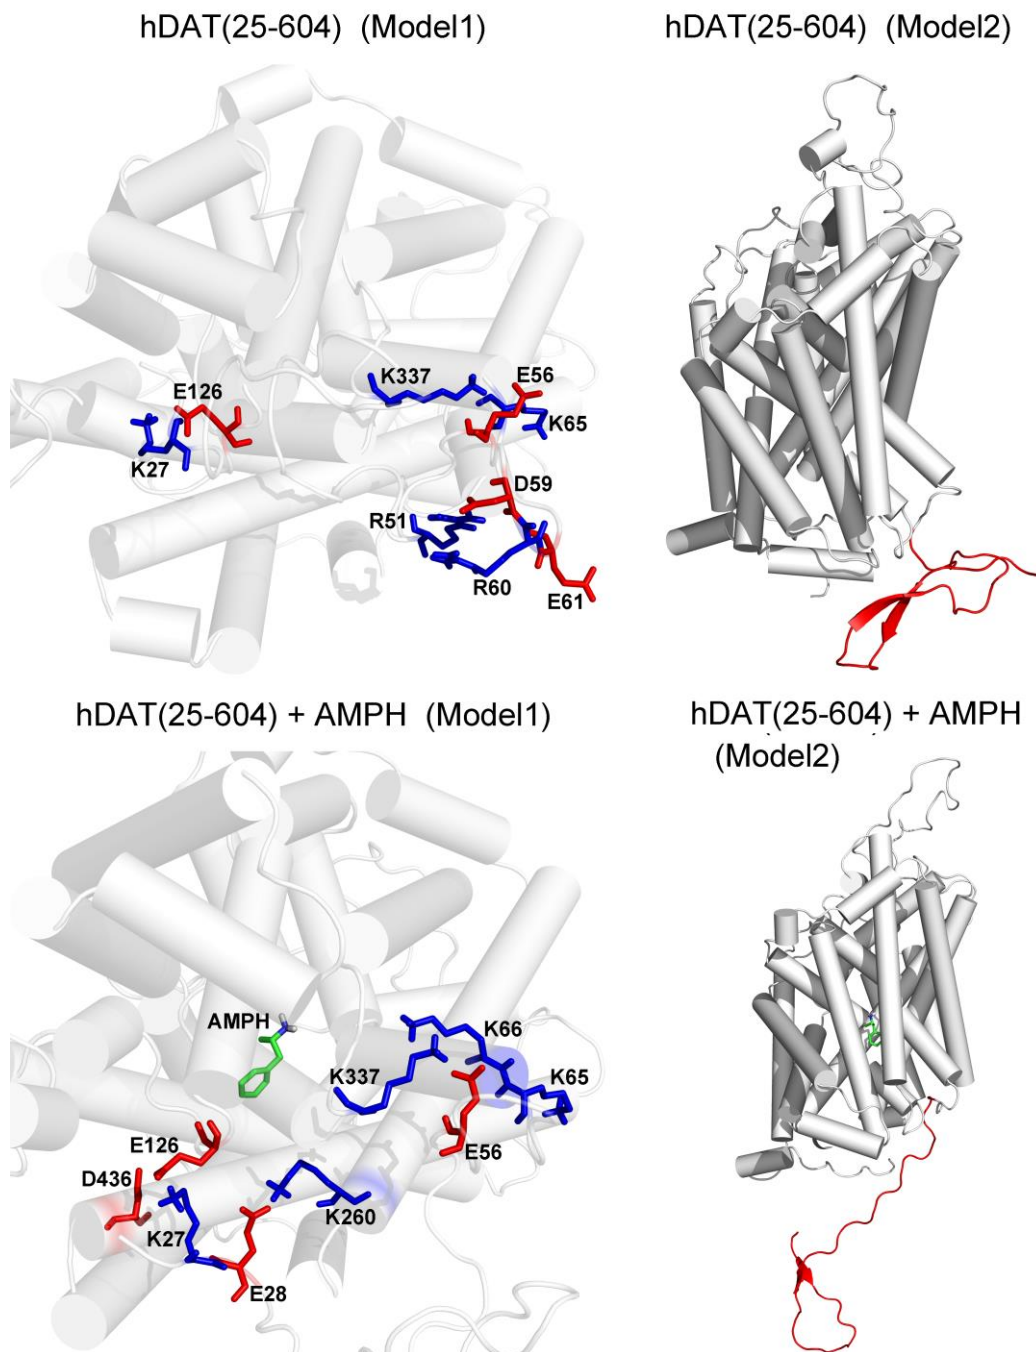

**Fig. S22.** Electrostatic network for hDAT(25–604) and AMPH-bound hDAT(25–604) models. For the contact frequency, see Table S2.

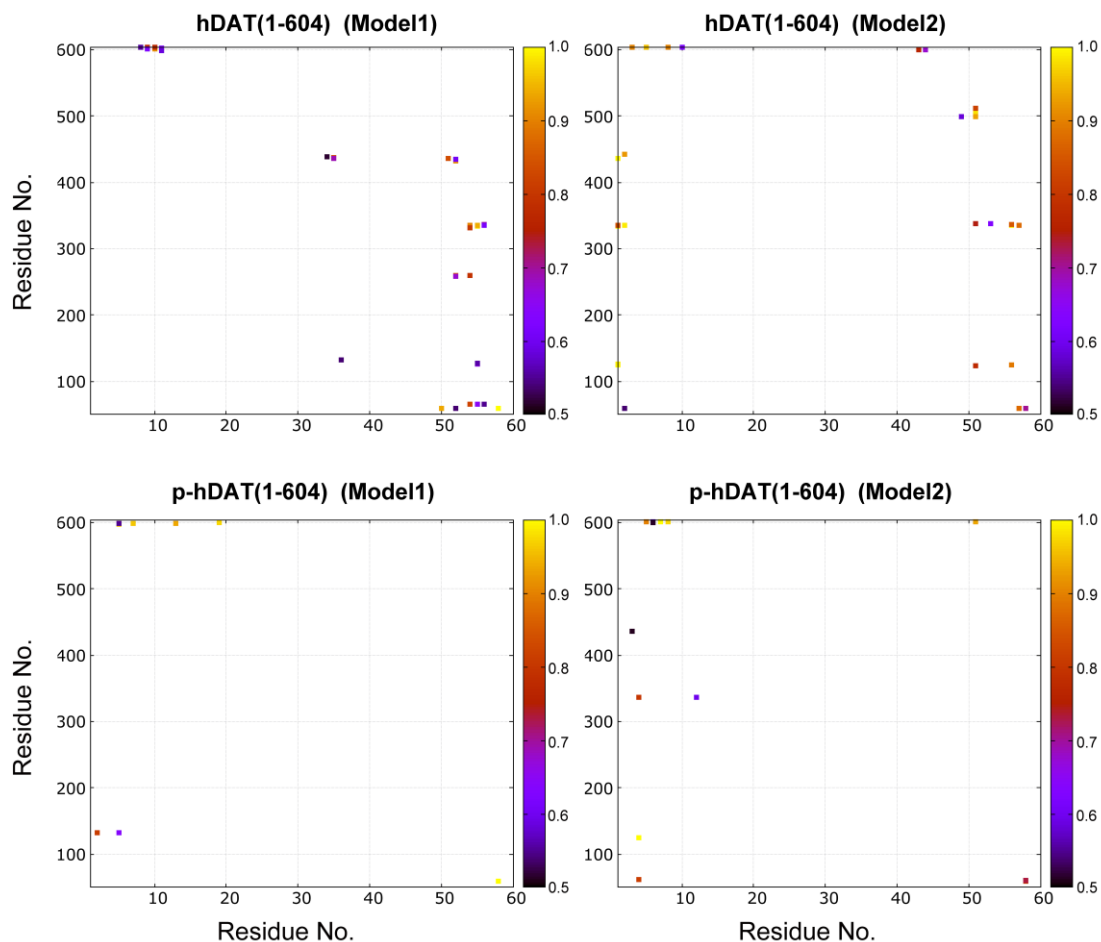

**Fig. S23.** Computed contact maps between residues in the N-terminal and the intracellular region of hDAT(1–604) and p-hDAT(1–604) models. A contact occurs if any atom in the N-terminal region is within 3 Å of any atom in the TM domains, and only a contact frequency >0.5 (50%) is shown. For electrostatic interactions, see Table S3. Contact frequency was calculated using the last 500-ns trajectory of each system. The contact maps for hDAT(1–604) models are the same as shown in Figure 4a and 4b of main text.

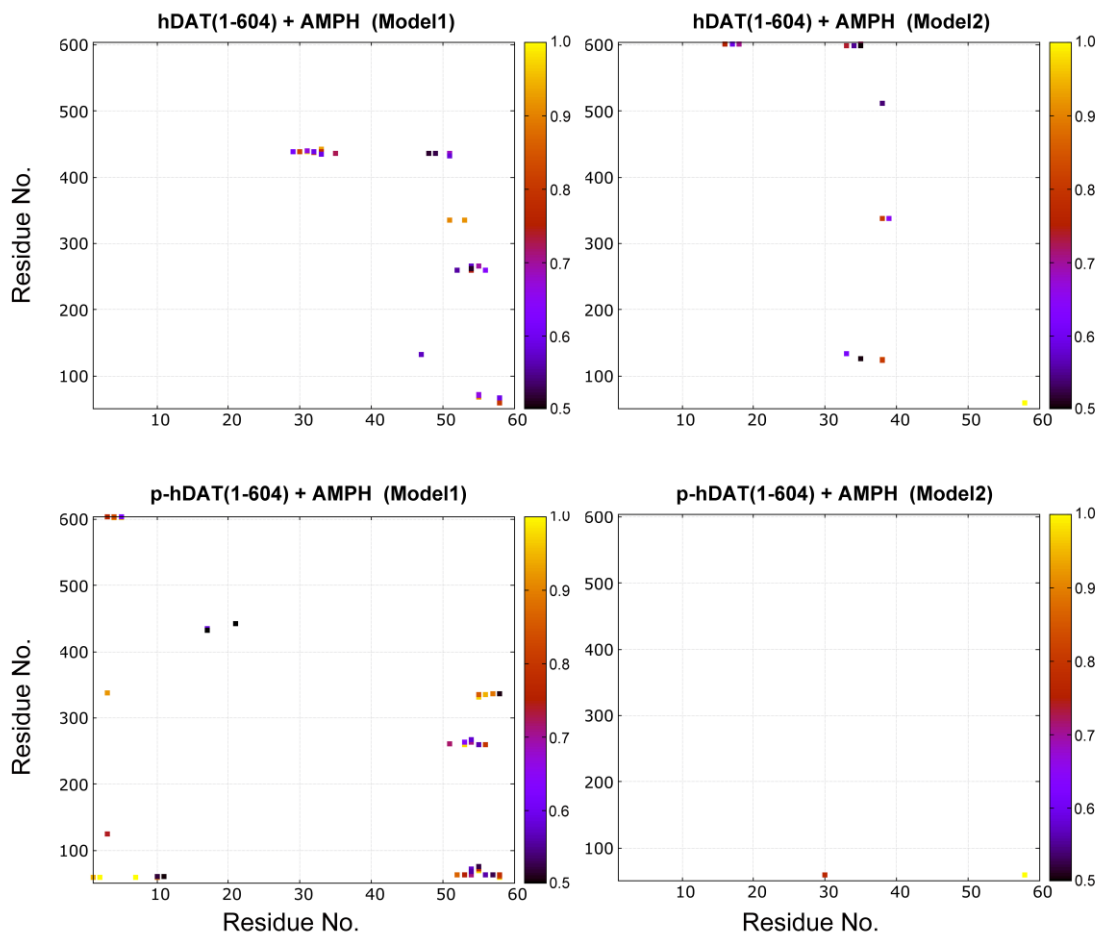

**Fig. S24.** Computed contact maps between residues in the N-terminal and the intracellular region of AMPH-bound hDAT(1–604) and AMPH-bound p-hDAT(1–604). A contact occurs if any atom in the N-terminal region is within 3 Å of any atom in the TM domains, and only a contact frequency >0.5 (50%) is shown. For electrostatic interactions, see Table S3. Contact frequency was calculated using the last 500-ns trajectory of each system. The contact maps for AMPH-bound p-hDAT(1–604) models are the same as shown in Figure 4c and 4d of main text.

**Table S3.** Contact frequency calculated for short-range electrostatic interactions between residues in the N-terminal and in the intracellular region of hDAT, p-hDAT, AMPH-bound hDAT, and AMPH-bound p-hDAT. IF and OF indicate inward-facing and outward-facing state, respectively. For details, see Figs. S24–S26.

| <b>hDAT(1–604) (Model1, IF)</b>          |                |                   | <b>hDAT(1–604) (Model2, OF)</b>          |                |                   |
|------------------------------------------|----------------|-------------------|------------------------------------------|----------------|-------------------|
| Residue in NT                            | Residue in TMs | Contact Frequency | Residue in NT                            | Residue in TMs | Contact Frequency |
| Arg51                                    | Asp436         | 0.84              | Arg51                                    | Asp507         | 0.98              |
| Lys35                                    | Glu437         | 0.82              | Glu56                                    | Arg125         | 0.89              |
| Glu56                                    | Lys337         | 0.70              | Glu56                                    | Lys337         | 0.85              |
| Lys35                                    | Asp436         | 0.69              |                                          |                |                   |
| Glu56                                    | Lys66          | 0.55              |                                          |                |                   |
| Glu36                                    | Lys133         | 0.54              |                                          |                |                   |
|                                          |                |                   |                                          |                |                   |
| <b>p-hDAT(1–604) (Model1, IF)</b>        |                |                   | <b>p-hDAT(1–604) (Model2, IF)</b>        |                |                   |
| Residue in NT                            | Residue in TMs | Contact Frequency | Residue in NT                            | Residue in TMs | Contact Frequency |
| Lys19                                    | Asp600         | 0.97              | Lys5                                     | Arg601         | 0.90              |
| Lys5                                     | Lys599         | 0.97              | Lys3                                     | Asp436         | 0.51              |
| Lys5                                     | Lys133         | 0.63              | p-Ser7                                   | Arg601         | 1.00              |
| Lys5                                     | Glu598         | 0.55              | p-Ser4                                   | Arg125         | 1.00              |
| p-Ser7                                   | Lys599         | 0.96              | p-Ser4                                   | Lys337         | 0.80              |
| p-Ser13                                  | Lys599         | 0.93              | p-Ser12                                  | Lys337         | 0.59              |
| p-Ser2                                   | Lys133         | 0.81              |                                          |                |                   |
|                                          |                |                   |                                          |                |                   |
| <b>hDAT(1–604) + AMPH (Model1, IF)</b>   |                |                   | <b>hDAT(1–604) + AMPH (Model2, IF)</b>   |                |                   |
| Residue in NT                            | Residue in TMs | Contact Frequency | Residue in NT                            | Residue in TMs | Contact Frequency |
| Lys35                                    | Asp436         | 0.72              | Lys35                                    | Arg601         | 0.72              |
| Arg51                                    | Asp436         | 0.68              | Lys35                                    | Glu598         | 0.64              |
| Glu56                                    | Lys260         | 0.64              | Lys35                                    | Glu126         | 0.50              |
|                                          |                |                   | Lys35                                    | Lys599         | 0.50              |
|                                          |                |                   |                                          |                |                   |
| <b>p-hDAT(1–604) + AMPH (Model1, OF)</b> |                |                   | <b>p-hDAT(1–604) + AMPH (Model2, IF)</b> |                |                   |
| Residue in NT                            | Residue in TMs | Contact Frequency | Residue in NT                            | Residue in TMs | Contact Frequency |
| Lys5                                     | Glu602         | 0.97              | Glu30                                    | Arg60          | 0.76              |
| Glu56                                    | Lys260         | 0.79              |                                          |                |                   |
| Lys3                                     | Arg125         | 0.74              |                                          |                |                   |
| p-Ser2                                   | Arg60          | 1.00              |                                          |                |                   |
| p-Ser7                                   | Arg60          | 1.00              |                                          |                |                   |
| p-Ser4                                   | Glu602         | 0.92              |                                          |                |                   |

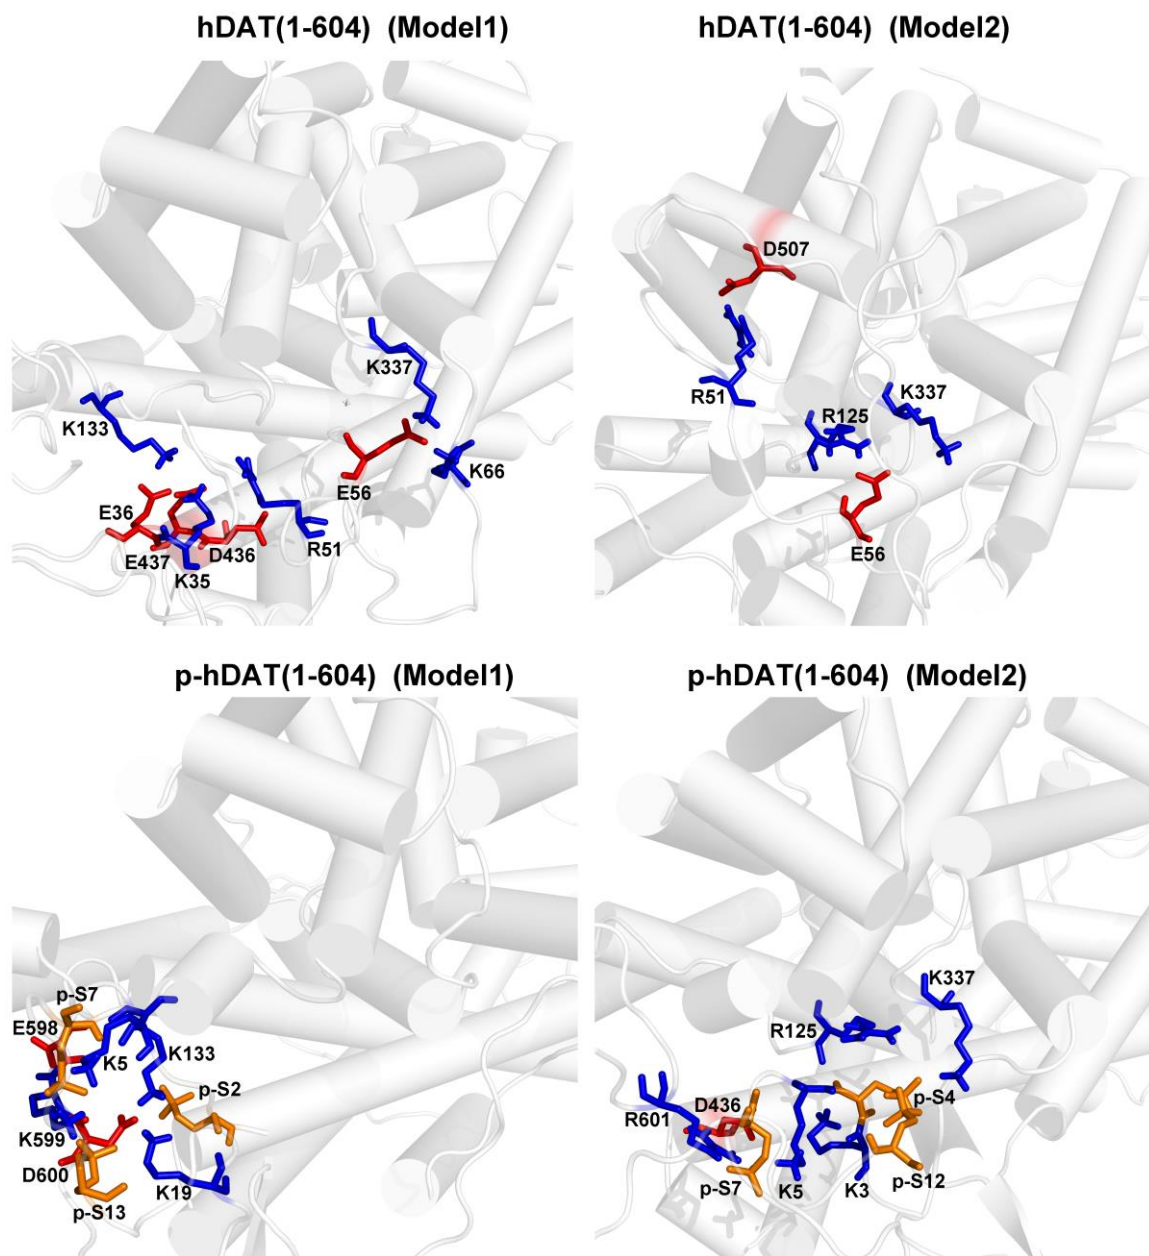

**Fig. S25.** Electrostatic network for hDAT(1–604) and p-hDAT(1–604) models. For the contact frequency, see Table S3.

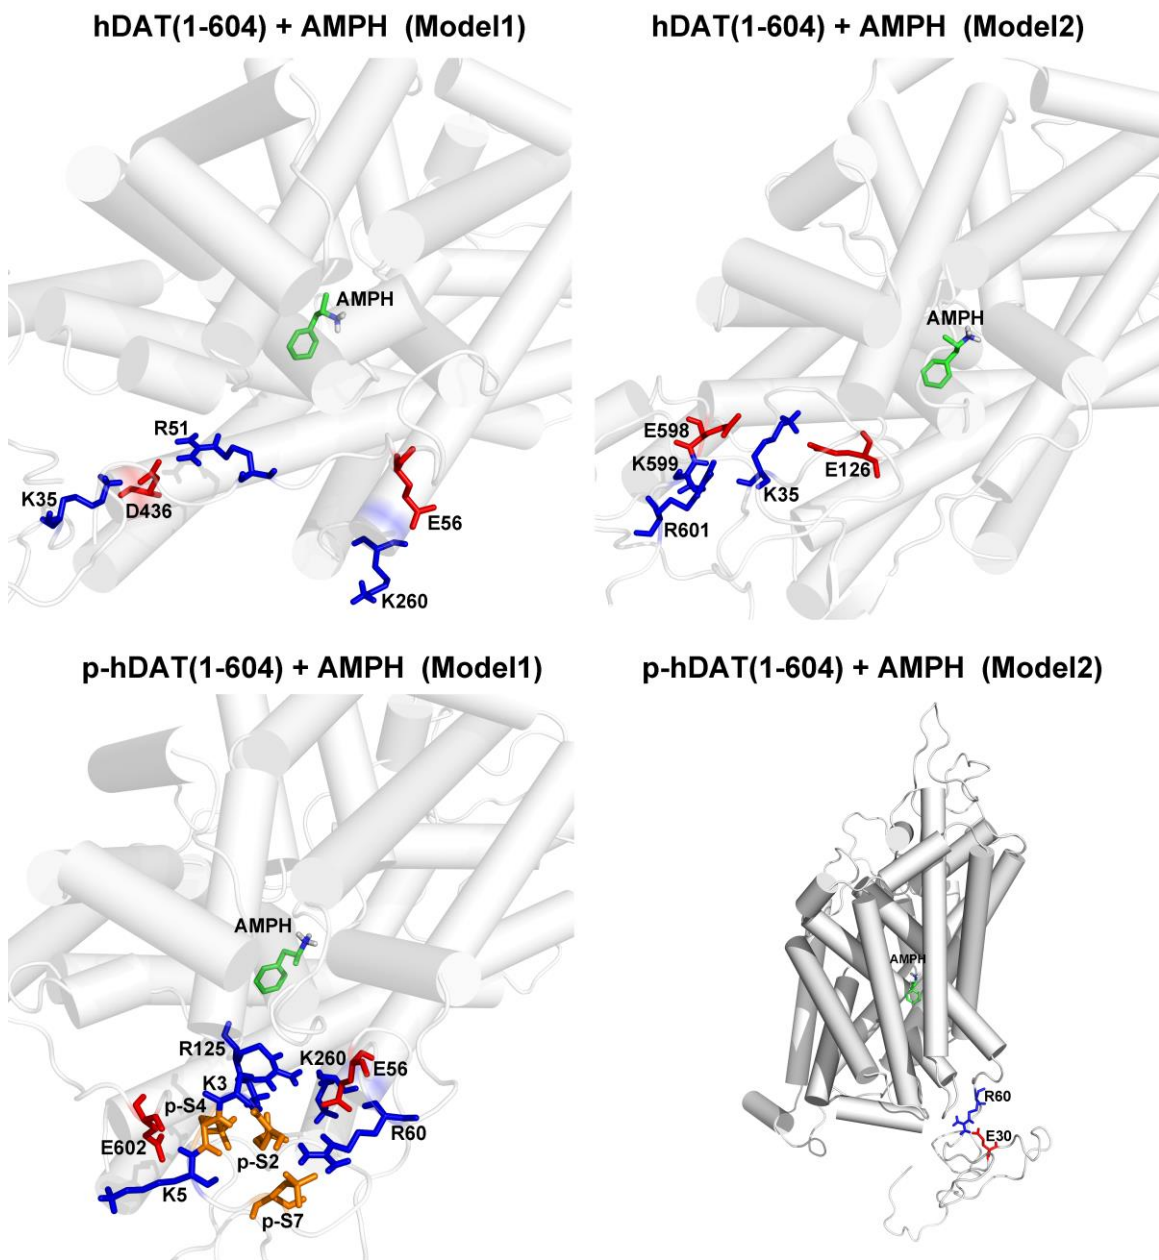

**Fig. S26.** Electrostatic network for AMPH-bound hDAT(1–604) and AMPH-bound p-hDAT(1–604) models. For the contact frequency, see Table S3.



**Table S4.** The contact frequency between the N-terminal region and the intracellular region of AMPH-bound hDAT(25–604) (Modell, OF). IC indicates intracellular side. The electrostatic interactions are highlighted in red.

| Residue in N-terminal | Residue in IC | Frequency   | Assignment  | Residue in N-terminal | Residue in IC | Frequency   | Assignment |
|-----------------------|---------------|-------------|-------------|-----------------------|---------------|-------------|------------|
| Ala57                 | Thr62         | 0.88        | N-terminal  | Val55                 | Tyr335        | 0.82        | IL3        |
| Gln52                 | Trp63         | 0.53        | N-terminal  | Val55                 | Asn336        | 0.93        | IL3        |
| Glu56                 | Gly64         | 0.78        | N-terminal  | <b>Glu56</b>          | <b>Lys337</b> | <b>1.00</b> | <b>IL3</b> |
| <b>Glu56</b>          | <b>Lys65</b>  | <b>0.77</b> | <b>TM1a</b> | Val55                 | Lys337        | 0.59        | IL3        |
| <b>Glu56</b>          | <b>Lys66</b>  | <b>0.72</b> | <b>TM1a</b> | Lys27                 | Thr432        | 0.51        | TM8        |
| Pro54                 | Asp68         | 0.84        | TM1a        | Lys27                 | Ile435        | 0.73        | TM8        |
| Val55                 | Phe69         | 0.94        | TM1a        | <b>Lys27</b>          | <b>Asp436</b> | <b>1.00</b> | <b>TM8</b> |
| Pro54                 | Phe69         | 0.76        | TM1a        | Gly25                 | Asp436        | 1.00        | TM8        |
| Thr43                 | Arg125        | 0.60        | IL1         | Pro26                 | Gln439        | 0.54        | IL4        |
| <b>Lys27</b>          | <b>Glu126</b> | <b>0.96</b> | <b>IL1</b>  | Pro26                 | His442        | 0.84        | IL4        |
| Lys27                 | Gly127        | 0.78        | IL1         | Gln41                 | Met511        | 0.51        | IL5        |
| <b>Glu28</b>          | <b>Lys260</b> | <b>0.53</b> | <b>IL2</b>  | Leu42                 | Lys599        | 0.59        | C-terminal |
| Arg51                 | Thr261        | 0.74        | IL2         | Gln41                 | Lys599        | 0.58        | C-terminal |
| Pro54                 | Gly263        | 0.77        | IL2         | Gly25                 | Val604        | 0.92        | C-terminal |
| Gln52                 | Lys264        | 0.80        | TM5         | Pro26                 | Val604        | 0.64        | C-terminal |
| Pro54                 | Lys264        | 0.70        | TM5         | Gln37                 | Val604        | 0.52        | C-terminal |
| Ser53                 | Tyr335        | 0.89        | IL3         |                       |               |             |            |

**Table S5.** The contact frequency between the N-terminal region and the intracellular region of hDAT(1–604) (Model2, OF). IC indicates intracellular side. The electrostatic interactions are highlighted in red.

| Residue in N-terminal | Residue in IC | Frequency | Assignment | Residue in N-terminal | Residue in IC | Frequency | Assignment |
|-----------------------|---------------|-----------|------------|-----------------------|---------------|-----------|------------|
| Gln58                 | Asp59         | 1.00      | N-terminal | Arg51                 | Phe338        | 0.74      | IL3        |
| Ala57                 | Asp59         | 0.87      | N-terminal | Ser53                 | Phe338        | 0.63      | IL3        |
| Ala57                 | Arg60         | 0.95      | N-terminal | Met1                  | Asp436        | 1.00      | TM8        |
| Gln58                 | Arg60         | 0.70      | N-terminal | Ser2                  | His442        | 0.92      | IL4        |
| Ser2                  | Arg60         | 0.54      | N-terminal | Arg51                 | Tyr499        | 0.93      | IL5        |
| Arg51                 | Phe123        | 0.77      | IL1        | Asn49                 | Tyr499        | 0.58      | IL5        |
| Met1                  | Arg125        | 1.00      | IL1        | Arg51                 | Asp507        | 0.98      | IL5        |
| Glu56                 | Arg125        | 0.89      | IL1        | Arg51                 | Met511        | 0.82      | IL5        |
| Met1                  | Glu126        | 0.99      | IL1        | Thr43                 | Asp600        | 0.76      | C-terminal |
| Met1                  | Ser334        | 0.99      | IL3        | Ser44                 | Asp600        | 0.67      | C-terminal |
| Glu56                 | Tyr335        | 0.99      | IL3        | Lys5                  | Leu603        | 0.96      | C-terminal |
| Ser2                  | Tyr335        | 0.99      | IL3        | Lys3                  | Leu603        | 0.90      | C-terminal |
| Ala57                 | Tyr335        | 0.87      | IL3        | Val8                  | Leu603        | 0.90      | C-terminal |
| Met1                  | Tyr335        | 0.84      | IL3        | Leu10                 | Leu603        | 0.62      | C-terminal |
| Glu56                 | Lys337        | 0.85      | IL3        | Lys5                  | Val604        | 0.99      | C-terminal |

**Table S6.** The contact frequency between the N-terminal region and the intracellular region of AMPH-bound p-hDAT(1–604) (Modell, OF). IC indicates intracellular side. The electrostatic interactions are highlighted in red.

| Residue in N-terminal | Residue in IC | Frequency | Assignment | Residue in N-terminal | Residue in IC | Frequency | Assignment |
|-----------------------|---------------|-----------|------------|-----------------------|---------------|-----------|------------|
| Gln58                 | Asp59         | 1.00      | N-terminal | Val55                 | Lys260        | 0.56      | IL2        |
| p-Ser7                | Arg60         | 1.00      | N-terminal | Arg51                 | Thr261        | 0.72      | IL2        |
| p-Ser2                | Arg60         | 1.00      | N-terminal | Pro54                 | Gly263        | 0.71      | IL2        |
| Met1                  | Arg60         | 0.94      | N-terminal | Ser53                 | Gly263        | 0.64      | IL2        |
| Leu10                 | Arg60         | 0.89      | N-terminal | Pro54                 | Lys264        | 0.75      | TM5        |
| Gln58                 | Glu61         | 0.84      | N-terminal | Pro54                 | Trp267        | 0.58      | TM5        |
| Leu10                 | Glu61         | 0.52      | N-terminal | Val55                 | Phe332        | 0.97      | IL3        |
| Met11                 | Glu61         | 0.50      | N-terminal | Glu56                 | Tyr335        | 0.94      | IL3        |
| Gln52                 | Trp63         | 0.86      | N-terminal | Val55                 | Tyr335        | 0.85      | IL3        |
| Gln58                 | Trp63         | 0.78      | N-terminal | Ala57                 | Asn336        | 0.88      | IL3        |
| Ser53                 | Trp63         | 0.75      | N-terminal | Ala57                 | Lys337        | 0.91      | IL3        |
| Pro54                 | Trp63         | 0.71      | N-terminal | Gln58                 | Lys337        | 0.51      | IL3        |
| Glu56                 | Trp63         | 0.56      | N-terminal | Lys3                  | Phe338        | 0.92      | IL3        |
| Ala57                 | Trp63         | 0.52      | N-terminal | Pro17                 | Thr432        | 0.50      | TM8        |
| Pro54                 | Asp68         | 0.56      | TM1a       | Pro17                 | Ile435        | 0.58      | TM8        |
| Val55                 | Phe69         | 0.97      | TM1a       | Pro21                 | His442        | 0.50      | IL4        |
| Pro54                 | Phe69         | 0.63      | TM1a       | Lys5                  | Glu602        | 0.97      | C-terminal |
| Val55                 | Ser72         | 0.82      | TM1a       | p-Ser4                | Glu602        | 0.92      | C-terminal |
| Pro54                 | Ser72         | 0.57      | TM1a       | Lys3                  | Leu603        | 0.89      | C-terminal |
| Val55                 | Val73         | 0.77      | TM1a       | p-Ser4                | Leu603        | 0.84      | C-terminal |
| Val55                 | Phe76         | 0.52      | TM1a       | p-Ser4                | Val604        | 0.83      | C-terminal |
| Lys3                  | Arg125        | 0.74      | IL1        | Lys3                  | Val604        | 0.76      | C-terminal |
| Ser53                 | Lys260        | 0.98      | IL2        | Lys5                  | Val604        | 0.61      | C-terminal |
| Glu56                 | Lys260        | 0.79      | IL2        |                       |               |           |            |

**Note:** A contact occurs if any atom in the N-terminal region is within 3 Å of any atom in the TM domains, and only a contact frequency >0.50 (50%) is shown.

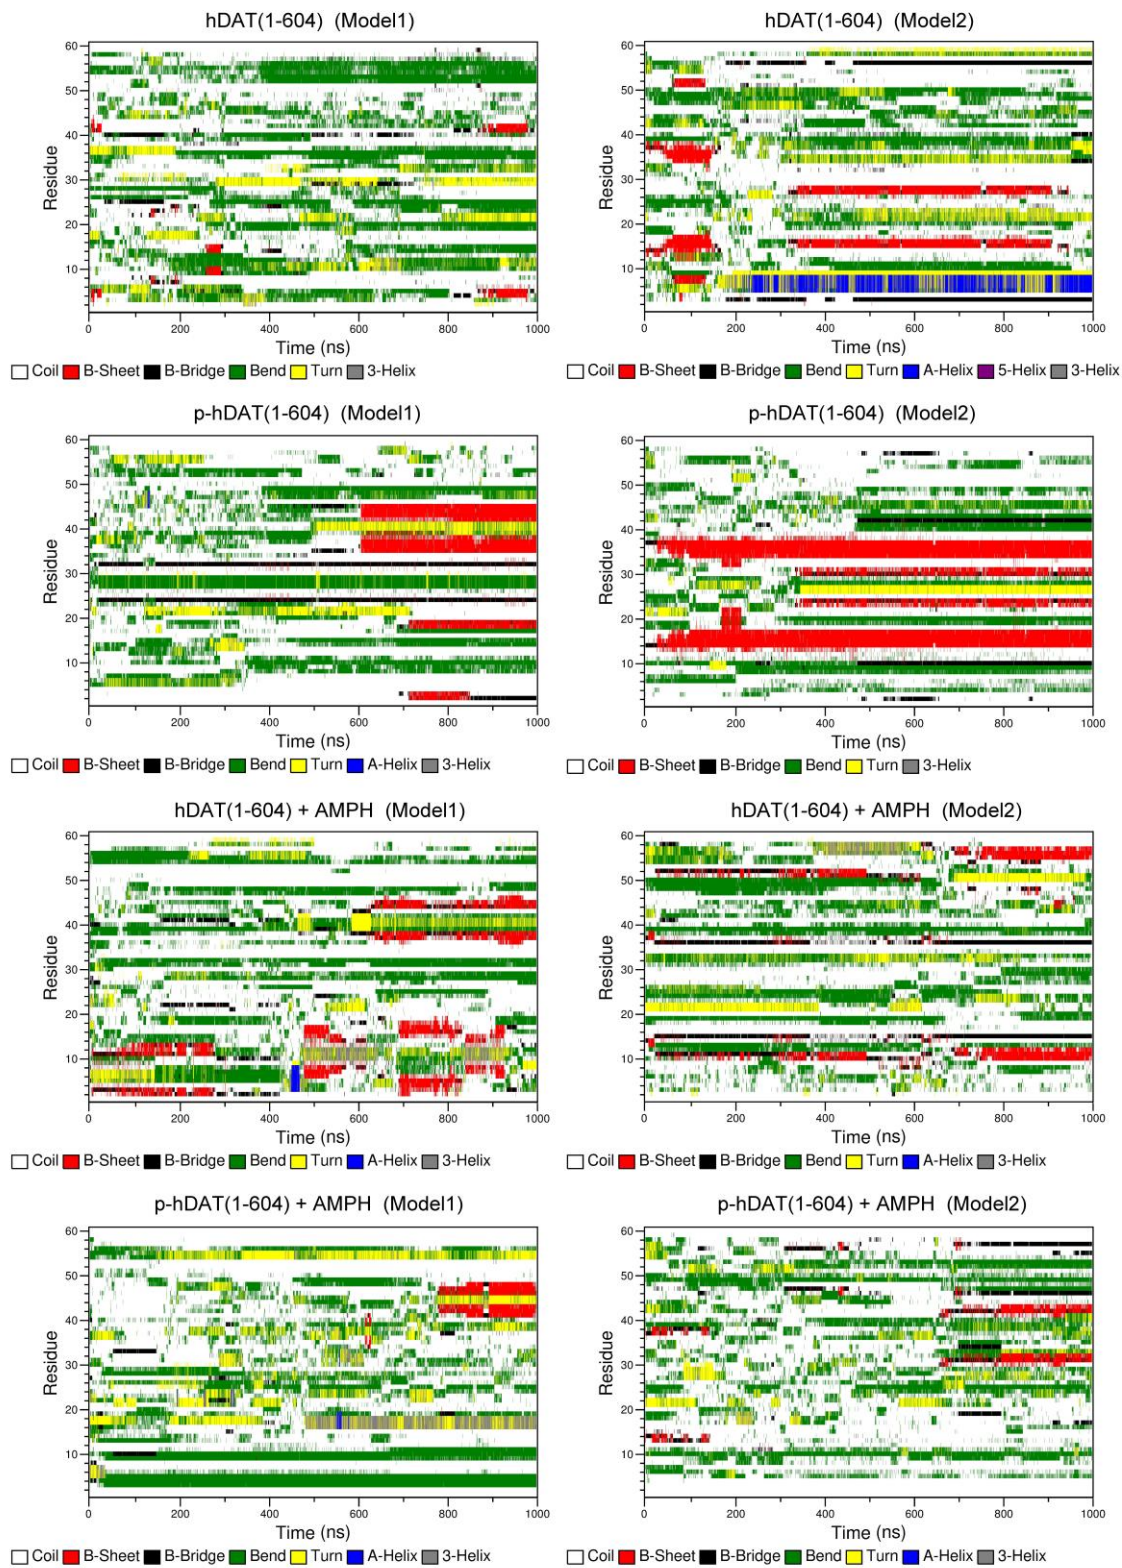

**Fig. S27.** Secondary structures calculated for the N-terminal in different systems. The formation of stable  $\beta$ -strands in p-hDAT(1–604) (Model2) was observed.

**Table S7.** The contact frequency between the N-terminal region and the intracellular region in the full-length p-hDAT+AMPH (Model1, OF). IC indicates intracellular side and IL indicates intracellular loop. The electrostatic interactions are highlighted in red.

| Residue in N-terminal | Residue in IC | Frequency | Assignment | Residue in N-terminal | Residue in IC | Frequency | Assignment |
|-----------------------|---------------|-----------|------------|-----------------------|---------------|-----------|------------|
| Gln58                 | Asp59         | 1.00      | N-terminal | Pro54                 | Trp267        | 0.53      | TM5        |
| Lys3                  | Asp59         | 1.00      | N-terminal | Pro17                 | Tyr335        | 1.00      | IL3        |
| Val15                 | Asp59         | 0.89      | N-terminal | Gln58                 | Lys337        | 0.98      | IL3        |
| p-Ser2                | Arg60         | 1.00      | N-terminal | Ala57                 | Lys337        | 0.76      | IL3        |
| p-Ser12               | Arg60         | 0.89      | N-terminal | Lys3                  | Phe338        | 0.93      | IL3        |
| Gln58                 | Arg60         | 0.54      | N-terminal | Pro21                 | Ile435        | 0.61      | TM8        |
| Gln58                 | Glu61         | 1.00      | N-terminal | Asn22                 | His442        | 0.78      | IL4        |
| Gln52                 | Trp63         | 1.00      | N-terminal | Lys5                  | Glu602        | 1.00      | C-terminal |
| Ala57                 | Trp63         | 0.99      | N-terminal | p-Ser4                | Glu602        | 0.98      | C-terminal |
| Pro54                 | Trp63         | 0.86      | N-terminal | p-Ser4                | Leu603        | 0.99      | C-terminal |
| Ala57                 | Gly64         | 0.95      | N-terminal | Lys3                  | Leu603        | 0.97      | C-terminal |
| Pro54                 | Gly64         | 0.91      | N-terminal | Lys3                  | Val604        | 0.85      | C-terminal |
| Val55                 | Phe69         | 0.95      | TM1a       | p-Ser4                | Val604        | 0.72      | C-terminal |
| Pro54                 | Phe69         | 0.59      | TMa1       | Met1                  | Arg606        | 0.94      | C-terminal |
| Val55                 | Ser72         | 0.56      | TM1a       | p-Ser4                | Arg606        | 0.76      | C-terminal |
| Pro54                 | Ser72         | 0.54      | TM1a       | Lys3                  | Arg606        | 0.56      | C-terminal |
| p-Ser4                | Arg125        | 1.00      | IL1        | Lys5                  | Arg606        | 0.50      | C-terminal |
| Ala16                 | Arg125        | 0.93      | IL1        | Met1                  | Val609        | 0.79      | C-terminal |
| Lys5                  | Arg125        | 0.88      | IL1        | p-Ser2                | Val609        | 0.75      | C-terminal |
| Lys3                  | Arg125        | 0.88      | IL1        | p-Ser7                | Arg610        | 1.00      | C-terminal |
| Ser53                 | Lys260        | 1.00      | IL2        | Met1                  | Arg610        | 0.86      | C-terminal |
| Val55                 | Lys260        | 0.88      | IL2        | p-Ser2                | Gln611        | 0.71      | C-terminal |
| Glu56                 | Lys260        | 0.70      | IL2        | p-Ser7                | Thr613        | 1.00      | C-terminal |
| Pro17                 | Lys260        | 0.60      | IL2        | p-Ser12               | Arg615        | 1.00      | C-terminal |
| Glu56                 | Thr261        | 0.99      | IL2        | Gly9                  | Arg615        | 1.00      | C-terminal |
| Ser53                 | Thr261        | 0.93      | IL2        | Val8                  | Arg615        | 1.00      | C-terminal |
| Arg51                 | Thr261        | 0.73      | IL2        | Leu10                 | Arg615        | 0.97      | C-terminal |
| Ser53                 | Gly263        | 0.97      | IL2        | p-Ser7                | Arg615        | 0.96      | C-terminal |
| Pro54                 | Gly263        | 0.52      | IL2        | Leu10                 | His616        | 0.67      | C-terminal |
| Pro54                 | Lys264        | 0.88      | TM5        | Leu10                 | Trp617        | 0.90      | C-terminal |
| Ser53                 | Lys264        | 0.74      | TM5        | Met11                 | Trp617        | 0.87      | C-terminal |
| Gln52                 | Lys264        | 0.64      | TM5        | Val40                 | Trp617        | 0.51      | C-terminal |

**Table S8.** The contact frequency between the N-terminal region and the intracellular region in the full-length hDAT (Model2, IF). IC indicates intracellular side and IL indicates intracellular loop. The electrostatic interactions are highlighted in red.

| Residue in N-terminal | Residue in IC | Frequency | Assignment | Residue in N-terminal | Residue in IC | Frequency | Assignment |
|-----------------------|---------------|-----------|------------|-----------------------|---------------|-----------|------------|
| Gln58                 | Asp59         | 1.00      | N-terminal | Gly39                 | Gln503        | 0.54      | IL5        |
| Met1                  | Asp59         | 0.82      | N-terminal | Gln41                 | Gln503        | 0.51      | IL5        |
| Leu31                 | Phe123        | 0.65      | IL1        | Lys35                 | Asp506        | 0.68      | IL5        |
| Met1                  | Arg125        | 0.97      | IL1        | Leu31                 | Gln510        | 0.99      | IL5        |
| Glu56                 | Arg125        | 0.88      | IL1        | Ile32                 | Gln510        | 0.99      | IL5        |
| Ser2                  | Arg125        | 0.55      | IL1        | Val34                 | Gln510        | 0.94      | IL5        |
| Ser2                  | Glu126        | 0.79      | IL1        | Lys35                 | Gln510        | 0.91      | IL5        |
| Met1                  | Glu126        | 0.52      | IL1        | Leu31                 | Met511        | 0.94      | IL5        |
| Gln41                 | Ile134        | 0.97      | IL1        | Ile32                 | Gly513        | 0.84      | IL5        |
| Leu42                 | Ile134        | 0.91      | IL1        | Leu42                 | Ile595        | 0.93      | C-terminal |
| Met1                  | Ser334        | 0.60      | IL3        | Val40                 | Pro597        | 0.74      | C-terminal |
| Leu31                 | Phe338        | 0.94      | IL3        | Gln41                 | Pro597        | 0.69      | C-terminal |
| Glu30                 | Phe338        | 0.68      | IL3        | Ser2                  | Arg601        | 0.52      | C-terminal |
| Glu30                 | Thr339        | 0.75      | IL3        | Lys3                  | Arg601        | 0.51      | C-terminal |
| Ile32                 | Thr339        | 0.50      | IL3        | Val8                  | Arg601        | 0.51      | C-terminal |
| Val15                 | Gln439        | 0.67      | IL4        | Val8                  | Leu603        | 0.93      | C-terminal |
| Val15                 | Hsd442        | 0.59      | IL4        | Pro50                 | Val604        | 0.56      | C-terminal |
| Val15                 | Arg443        | 0.77      | IL4        | Leu47                 | Arg606        | 0.58      | C-terminal |
| Pro17                 | Arg443        | 0.64      | IL4        | Leu10                 | Trp617        | 0.54      | C-terminal |
| Leu42                 | Phe498        | 0.96      | IL5        | Met11                 | Trp617        | 0.50      | C-terminal |
| Gln41                 | Phe498        | 0.61      | IL5        | Leu10                 | Leu618        | 0.95      | C-terminal |
| Gln41                 | Tyr499        | 0.92      | IL5        |                       |               |           |            |

**Table S9.** The contact frequency between the N-terminal region and the intracellular region in the designed full-length hDAT (OF). IC indicates intracellular side and IL indicates intracellular loop. The electrostatic interactions are highlighted in red.

| Residue<br>in N-<br>terminal | Residue<br>in IC | Frequency   | Assignment | Residue<br>in N-<br>terminal | Residue<br>in IC | Frequency   | Assignment        |
|------------------------------|------------------|-------------|------------|------------------------------|------------------|-------------|-------------------|
| Gln58                        | Asp59            | 1.00        | N-terminal | Met1                         | Tyr335           | 0.53        | IL3               |
| Ala57                        | Asp59            | 0.59        | N-terminal | <b>Glu56</b>                 | <b>Lys337</b>    | <b>0.61</b> | <b>IL3</b>        |
| Gln58                        | Arg60            | 0.57        | N-terminal | Ser53                        | Phe338           | 0.56        | IL3               |
| <b>Glu56</b>                 | <b>Arg125</b>    | <b>0.76</b> | <b>IL1</b> | Met1                         | Asp436           | 0.68        | TM8               |
| Met1                         | Arg125           | 0.64        | IL1        | <b>Arg51</b>                 | <b>Gln510</b>    | <b>0.5</b>  | <b>IL5</b>        |
| Met1                         | Glu126           | 0.77        | IL1        | Arg51                        | Met511           | 0.52        | IL5               |
| Met1                         | Ser334           | 0.62        | IL3        | <b>Lys3</b>                  | <b>Asp600</b>    | <b>0.62</b> | <b>C-terminal</b> |
| Glu56                        | Tyr335           | 0.56        | IL3        | <b>Lys5</b>                  | <b>Glu602</b>    | <b>0.65</b> | <b>C-terminal</b> |



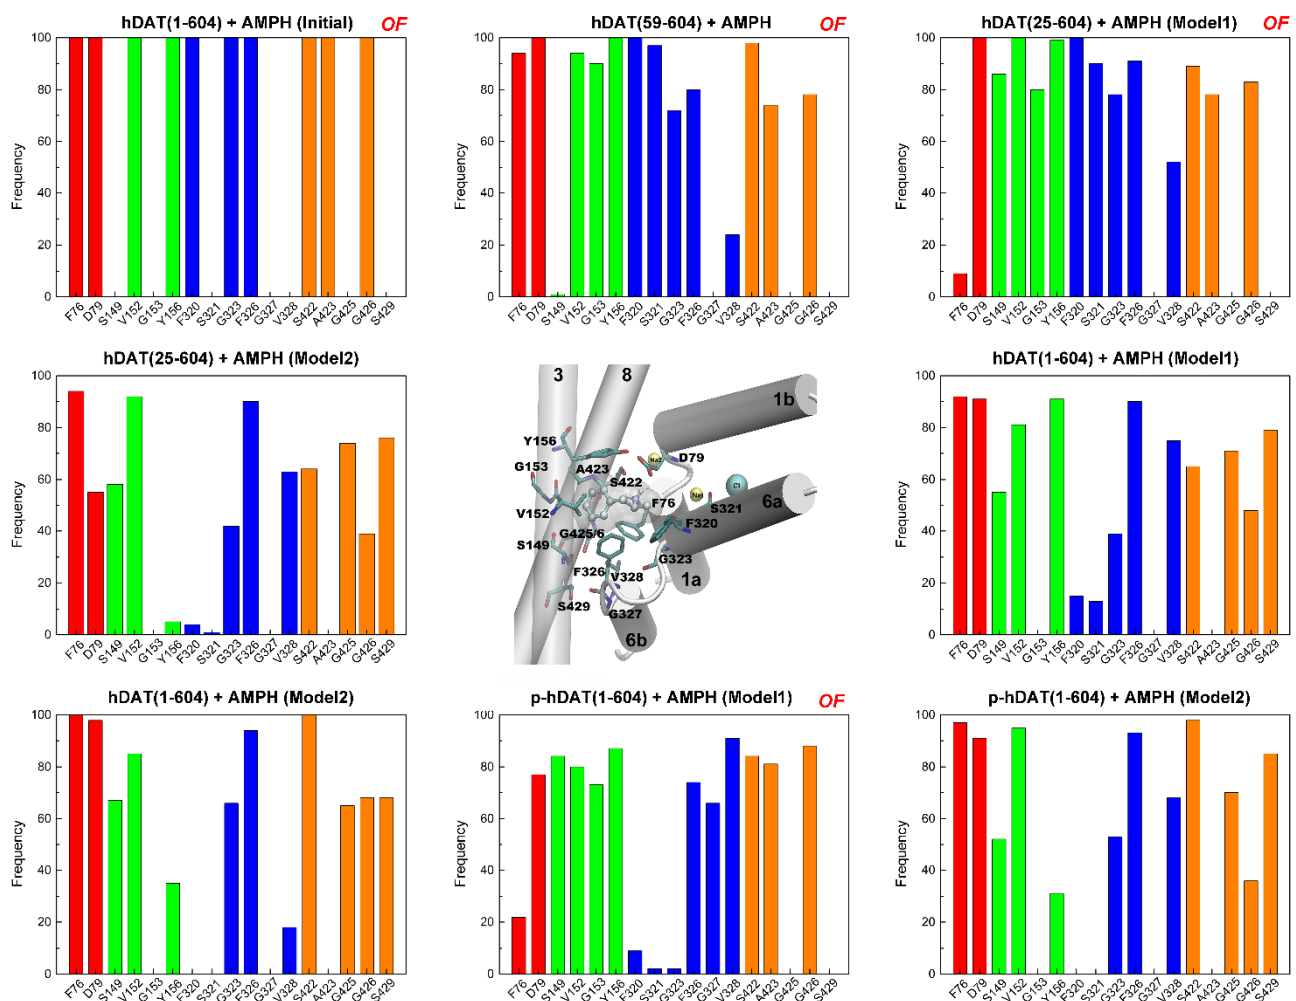

**Fig. S28.** Residues interacting with AMPH and their contact frequencies (%) calculated for all AMPH-bound systems. Contact frequency for residues in TM1 (Phe76 and Asp79), TM3 (Ser149, Val152, Gly153, and Tyr156), TM6 (Phe320, Ser321, Gly323, Phe326, Gly327, and Val328), and TM8 (Ser422, Ala423, Gly425, Gly426, and Ser429) are colored in red, green, blue, and orange, respectively. The binding pocket of AMPH is shown in the center. One Na<sup>+</sup> (Na1) is coordinated with Ser321, and the other Na<sup>+</sup> (Na2) is coordinated with Ser422. hDAT in the outward-facing open conformation is denoted as OF, and the remaining hDATs are in the inward-facing open conformations. A contact occurs if any atom in AMPH is within 3 Å of any atom in hDAT.



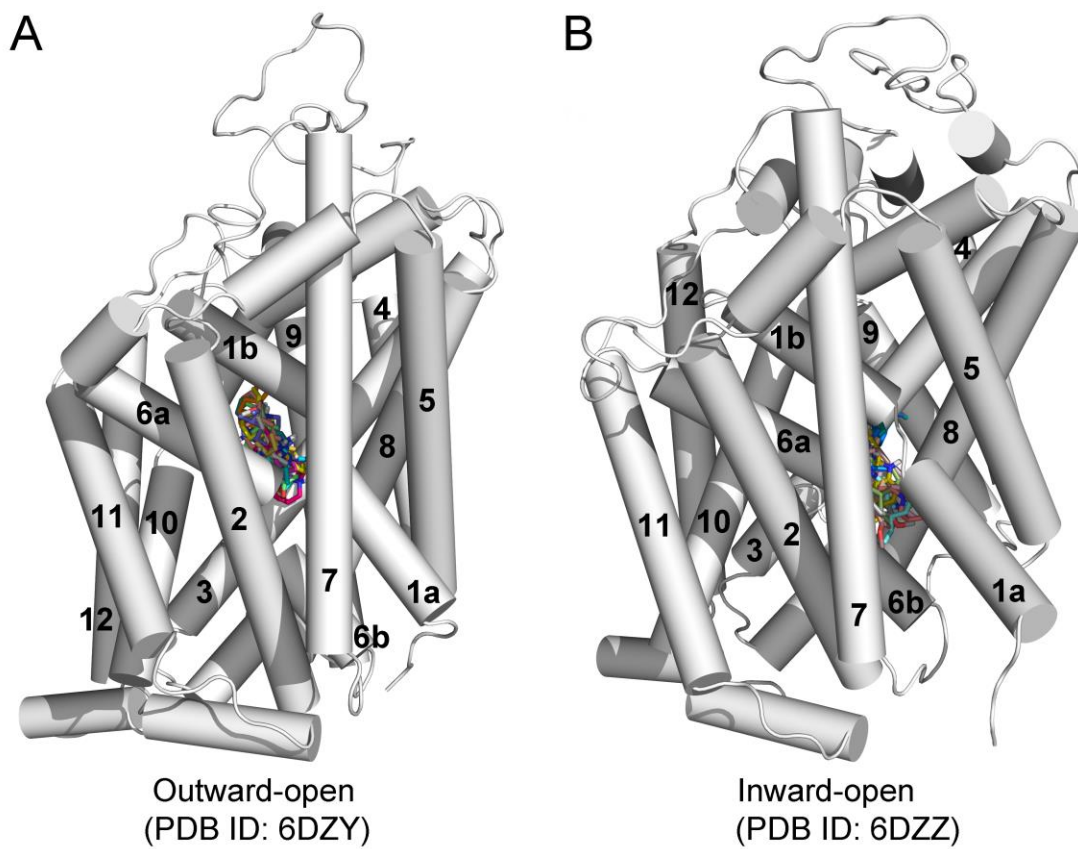

**Fig. S29.** Molecular docking of ibogaine to hSERT in the outward-open and inward-open conformations.

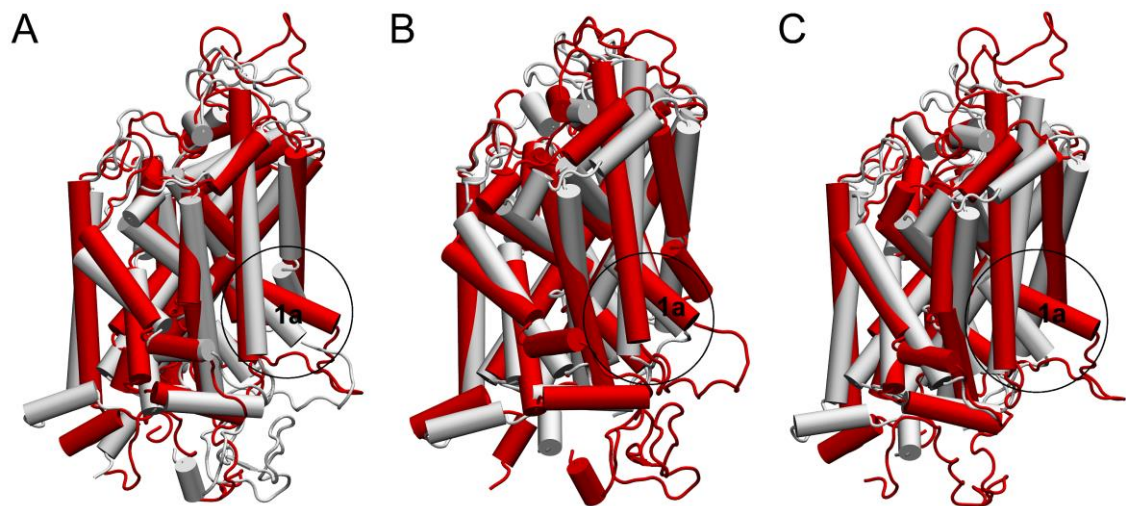

**Fig. S30.** Representative conformations of hDAT obtained from MD simulations. (A) Superposition of the outward-open (white) and the inward-open (red) conformations. (B) Superposition of the crystal structure of dDAT (in the outward-open conformation, PDB ID: 4XP9, white) and the outward-open (red) conformation of hDAT obtained from the present MD simulations. (C) Superposition of the crystal structure of dDAT (in the outward-open conformation, PDB ID: 4XP9, white) and the inward-open (red) conformation of hDAT obtained from the present MD simulations. The movement of transmembrane helix 1a was highlighted in circle.

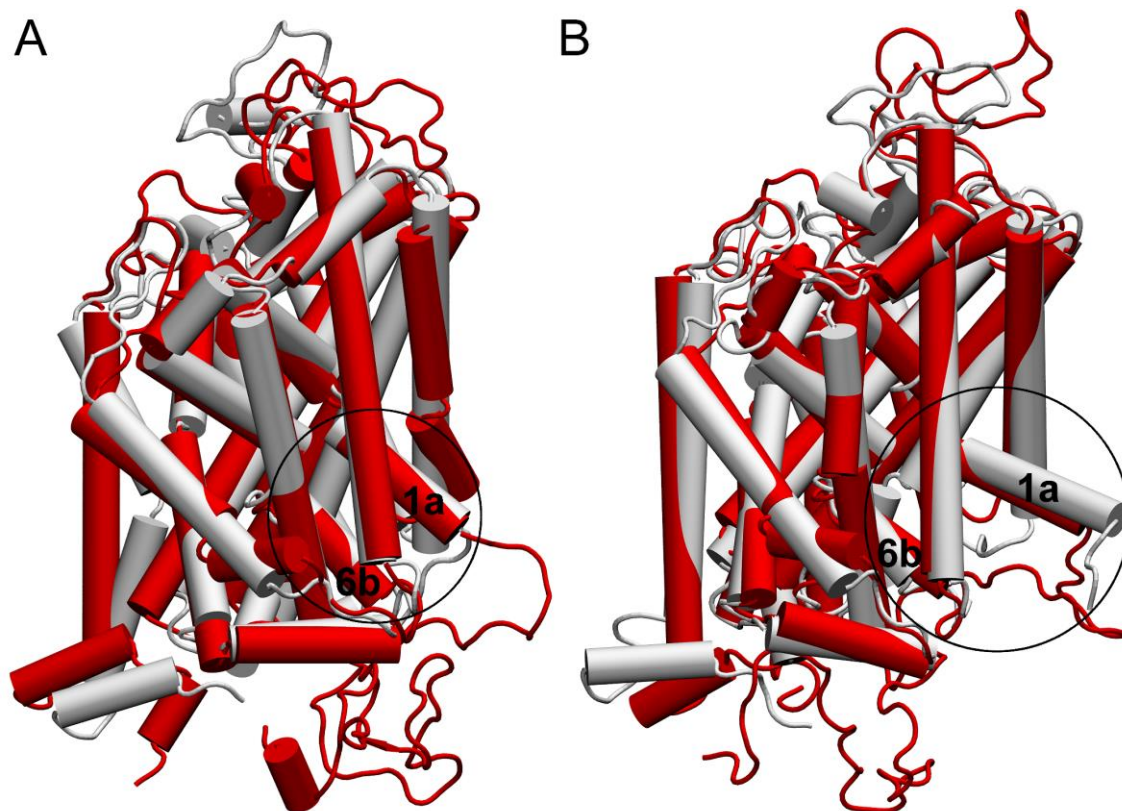

**Fig. S31.** Superposition of representative conformations of hDAT obtained from MD simulations and the conformations of hSERT. (A) Superposition of the outward-open (white) conformation of hSERT (PDB ID: 6DZY) and the outward-open (red) conformation of hDAT. (B) Superposition of the inward-open (white) conformation of hSERT (PDB ID: 6DZZ) and the inward-open (red) conformation of hDAT. The positions of transmembrane helix 1a and 6b were highlighted in circle.

## References

- 1 Laskowski, R. A. & Swindells, M. B. LigPlot+: Multiple Ligand–Protein Interaction Diagrams for Drug Discovery. *Journal of Chemical Information and Modeling* **51**, 2778-2786, doi:10.1021/ci200227u (2011).
- 2 Wang, J., Cieplak, P. & Kollman, P. A. How well does a restrained electrostatic potential (RESP) model perform in calculating conformational energies of organic and biological molecules? *Journal of Computational Chemistry* **21**, 1049-1074, doi:10.1002/1096-987x(200009)21:12<1049::aid-jcc3>3.0.co;2-f (2000).
- 3 Frisch, M. J.; Trucks, G. W.; Schlegel, H. B.; Scuseria, G. E.; Robb, M. A.; Cheeseman, J. R.; Zakrzewski, V. G.; Montgomery, J. A., Jr.; Stratmann, R. E.; Burant, J. C.; Dapprich, S.; Millam, J. M.; Daniels, A. D.; Kudin, K. N.; Strain, M. C.; Farkas, O.; Tomasi, J.; Barone, V.; Cossi, M.; Cammi, R.; Mennucci, B.; Pomelli, C.; Adamo, C.; Clifford, S.; Ochterski, J.; Petersson, G. A.; Ayala, P. Y.; Cui, Q.; Morokuma, K.; Malick, D. K.; Rabuck, A. D.; Raghavachari, K.; Foresman, J. B.; Cioslowski, J.; Ortiz, J. V.; Stefanov, B. B.; Liu, G.; Liashenko, A.; Piskorz, P.; Komaromi, I.; Gomperts, R.; Martin, R. L.; Fox, D. J.; Keith, T.; Al-Laham, M. A.; Peng, C. Y.; Nanayakkara, A.

Gonzalez, C.; Challacombe, M.; Gill, P. M. W.; Johnson, B.; Chen, W.; Wong, M. W.; Gonzalez, C.; Pople, J. A. Gaussian 03, Revision E.01; Gaussian Inc.: Wallingford CT, 2004.
